# Maximum likelihood estimation of natural selection and allele age from time series data of allele frequencies

Zhangyi He<sup>a,1,\*</sup>, Xiaoyang Dai<sup>b</sup>, Mark Beaumont<sup>b</sup>, Feng Yu<sup>c,\*</sup>

<sup>a</sup>*Department of Statistics, University of Oxford, Oxford OX1 3LB, United Kingdom*

<sup>b</sup>*School of Biological Sciences, University of Bristol, Bristol BS8 1TQ, United Kingdom*

<sup>c</sup>*School of Mathematics, University of Bristol, Bristol BS8 1UG, United Kingdom*

---

## Abstract

Temporally spaced genetic data allow for more accurate inference of population genetic parameters and hypothesis testing on the recent action of natural selection. In this work, we develop a novel likelihood-based method for jointly estimating selection coefficient and allele age from time series data of allele frequencies. Our approach is based on a hidden Markov model where the underlying process is a Wright-Fisher diffusion conditioned to survive until the time of the most recent sample. This formulation circumvents the assumption required in existing methods that the allele is created by mutation at a certain low frequency. We calculate the likelihood by numerically solving the resulting Kolmogorov backward equation backwards in time while re-weighting the solution with the emission probabilities of the observation at each sampling time point. This procedure reduces the two-dimensional numerical search for the maximum of the likelihood surface for both the selection coefficient and the allele age to a one-dimensional search over the selection coefficient only. We illustrate through extensive simulations that our method can produce accurate estimates of the selection coefficient and the allele age under both constant and non-constant demographic histories. We apply our approach to re-analyse ancient DNA data associated with horse base coat colours. We find that ignoring demographic histories or grouping raw samples can significantly bias the inference results.

*Keywords:* Natural selection, Allele age, Conditioned Wright-Fisher diffusion, Hidden Markov model, Maximum likelihood estimation

---

\*Corresponding author.

*Email addresses:* [zhangyi.he@stats.ox.ac.uk](mailto:zhangyi.he@stats.ox.ac.uk) (Zhangyi He), [feng.yu@bristol.ac.uk](mailto:feng.yu@bristol.ac.uk) (Feng Yu)

<sup>1</sup>Present address: Department of Epidemiology and Biostatistics, School of Public Health, Imperial College London, London W2 1PG, United Kingdom & Email: [z.he@imperial.ac.uk](mailto:z.he@imperial.ac.uk)

## 1 1. Introduction

2 Recent advances in ancient DNA (aDNA) preparation and sequencing techniques have made  
3 available an increasing amount of high-quality time serial samples of segregating alleles in an-  
4 cestral populations, *e.g.*, for humans (Sverrisdóttir et al., 2014; Mathieson et al., 2015), chickens  
5 (Flink et al., 2014; Loog et al., 2017) and horses (Ludwig et al., 2009; Pruvost et al., 2011).  
6 Such time series genetic data provide valuable information about allele frequency trajectories  
7 through time and allow for a better understanding of the evolutionary history of populations  
8 (see Leonardi et al., 2017, for a detailed review of the most recent findings in aDNA). One of  
9 the most important applications of aDNA is to study natural selection since it enables us to di-  
10 rectly track the change in allele frequencies over time, which is the characteristic of the action of  
11 natural selection. A number of studies over the last decade have been published capitalising on  
12 the temporal aspect of aDNA data to characterise the process of natural selection. For example,  
13 Mathieson et al. (2015) used aDNA data to identify candidate loci under natural selection in  
14 European humans.

15 This line of work was initiated by Bollback et al. (2008), which proposed a likelihood-based  
16 approach to estimate selection coefficient from time series data of allele frequencies, assuming  
17 a Wright-Fisher model introduced by Fisher (1922) and Wright (1931). The allele frequency of  
18 the underlying population was modelled as a latent variable in a hidden Markov model (HMM),  
19 where the allele frequency of the sample drawn from the underlying population at each given  
20 time point was treated as a noisy observation of the latent population allele frequency. Since  
21 there is no tractable analytical form for the transition probabilities of the Wright-Fisher model  
22 and its numerical evaluation is computationally prohibitive for large population sizes and evo-  
23 lutionary timescales, the Wright-Fisher model in their likelihood calculations was approximated  
24 with its standard diffusion limit, termed the Wright-Fisher diffusion. The transition probabili-  
25 ties of the allele frequencies were calculated by numerically solving the Kolmogorov backward  
26 equation (KBE) resulting from the Wright-Fisher diffusion. Using the method of Bollback et al.  
27 (2008), Ludwig et al. (2009) analysed the aDNA data associated with horse coat colouration and  
28 found that natural selection acted strongly on the gene encoding the Agouti signalling peptide  
29 (*ASIP*) and the gene encoding the melanocortin 1 receptor (*MC1R*).

30 Malaspinas et al. (2012) extended the HMM framework of Bollback et al. (2008) to jointly

31 estimate selection coefficient, population size and allele age based on time series data of allele  
32 frequencies. Allele age is the elapsed time since the allele was created by mutation. Along with  
33 the selection coefficient, allele age plays an important role in determining the sojourn time of a  
34 beneficial mutation (see Slatkin & Rannala, 2000, for a review). The joint estimation of allele  
35 age circumvents the assumption required in Bollback et al. (2008) that the allele frequency  
36 of the underlying population at the initial sampling time point was taken to be the observed  
37 allele frequency of the sample or was assumed to be uniformly distributed. In Malaspinas et al.  
38 (2012), the transition probabilities of the allele frequencies were calculated by approximating  
39 the Wright-Fisher diffusion with a one-step Markov process on a grid. Steinrücken et al. (2014)  
40 presented an extension of the HMM framework of Bollback et al. (2008) by capitalising on a  
41 spectral representation of the Wright-Fisher diffusion introduced by Song & Steinrücken (2012),  
42 which allows for a more general diploid model of natural selection such as the case of under- or  
43 overdominance. Ferrer-Admetlla et al. (2016) extended the HMM framework of Bollback et al.  
44 (2008) by approximating the Wright-Fisher diffusion with a coarse-grained Markov model that  
45 preserves the long-term behaviour of the Wright-Fisher diffusion. Their method can additionally  
46 estimate mutation rate. However, the methods of Steinrücken et al. (2014) and Ferrer-Admetlla  
47 et al. (2016) are unable to infer allele age as recurrent mutations were allowed in their model.  
48 Malaspinas (2016) provided an excellent review of existing approaches for studying natural  
49 selection with aDNA samples.

50 More recently, Schraiber et al. (2016) developed a Bayesian method under the HMM frame-  
51 work of Bollback et al. (2008) for the joint inference of natural selection and allele age from  
52 temporally spaced samples. Their key innovation was to apply a high-frequency path augmen-  
53 tation approach to circumvent the difficulty inherent in calculating the transition probabilities  
54 of the allele frequencies under the Wright-Fisher diffusion. Markov chain Monte Carlo (MCMC)  
55 techniques were employed to integrate over all possible allele frequency trajectories of the un-  
56 derlying population consistent with the observations. The computational advantage of the path  
57 augmentation method allows for general diploid models of natural selection and non-constant  
58 population sizes. However, to update the sample paths of the Wright-Fisher diffusion bridge,  
59 they used Bessel bridges of order four, which is somewhat challenging from both a mathematical  
60 and a programming perspective.

61 In the present work, we propose a novel likelihood-based approach for jointly estimating  
62 selection coefficient and allele age from time serial samples of segregating alleles. Our method  
63 is also an extension of Bollback et al. (2008) but differs from most existing approaches in two  
64 respects. Firstly, we incorporate a non-constant population size into the Wright-Fisher diffusion.  
65 Secondly, we condition the Wright-Fisher diffusion, which is taken to be the underlying process  
66 in our HMM framework, to survive until the time of the most recent sample. Our conditioned  
67 Wright-Fisher diffusion allows us to take different demographic histories into account and avoid  
68 the somewhat arbitrary initial condition that the allele was created by mutation at a certain low  
69 frequency, *e.g.*, as used in Malaspinas et al. (2012) and Schraiber et al. (2016). Our likelihood  
70 computation is carried out by numerically solving the KBE associated with the conditioned  
71 Wright-Fisher diffusion backwards in time and re-weighting the solution with the emission  
72 probabilities of the observation at each given time point. The values of the re-weighted solution  
73 at frequency 0 give the likelihood of the selection coefficient and the allele age. For each fixed  
74 selection coefficient, the likelihood for all values of the allele age can be obtained by numerically  
75 solving the KBE only once. This advance enables a reduction of the two-dimensional numerical  
76 search for the maximum of the likelihood surface for both the selection coefficient and the allele  
77 age, *e.g.*, as used in Malaspinas et al. (2012), to a one-dimensional numerical search over the  
78 selection coefficient only.

79 We evaluate the performance of our method with extensive simulations and show that our  
80 method allows for efficient and accurate estimation of natural selection and allele age from allele  
81 frequency time series data under both constant and non-constant demographic histories, even  
82 if the samples are sparsely distributed in time with small uneven sizes. Our simulation studies  
83 illustrate that ignoring demographic history does not affect the inference of natural selection but  
84 bias the estimation of allele age. We also use our approach to re-analyse the time serial samples  
85 of segregating alleles associated with horse base coat colours from earlier studies of Ludwig et al.  
86 (2009), Pruvost et al. (2011) and Wutke et al. (2016). We choose this aDNA dataset, despite  
87 being the focus of previous analyses (Ludwig et al., 2009; Malaspinas et al., 2012; Steinrücken  
88 et al., 2014; Schraiber et al., 2016), because it allows an instructive comparison with existing  
89 methods. Unlike these previous studies, our analysis is performed on the raw samples (drawn at  
90 62 sampling time points) rather than the grouped samples (drawn at 9 sampling time points).

91 Our results suggest that horse base coat colour variation could be associated with adaptation  
92 to the climate change caused by the transition from a glacial period to an interglacial period.  
93 Finally, we perform an empirical study demonstrating that grouping aDNA samples can alter  
94 the results of the inference of natural selection and allele age.

## 95 2. Materials and Methods

96 In this section, we begin with a brief review of the Wright-Fisher diffusion for a single locus  
97 evolving subject to natural selection and then derive the Wright-Fisher diffusion conditioned to  
98 survive until a given time point. We also describe our likelihood-based method for co-estimating  
99 selection coefficient and allele age from time series data of allele frequencies, *e.g.*, how to set up  
100 the HMM framework incorporating the conditioned Wright-Fisher diffusion and how to calculate  
101 the likelihood for the population genetic quantities of interest.

### 102 2.1. Wright-Fisher diffusion

103 We consider a population of  $N$  randomly mating diploid individuals at a single locus  $\mathcal{A}$   
104 evolving subject to natural selection according to the Wright-Fisher model (see, *e.g.*, Durrett,  
105 2008, for more details). We assume discrete time, non-overlapping generations and non-constant  
106 population size. Suppose that there are two possible allele types at locus  $\mathcal{A}$ , labelled  $\mathcal{A}_1$  and  $\mathcal{A}_2$ ,  
107 respectively. The symbol  $\mathcal{A}_1$  is attached to the mutant allele, which is assumed to arise only once  
108 at time  $t_0$  within the population and be favoured by natural selection once it exists. The symbol  
109  $\mathcal{A}_2$  is attached to the ancestral allele, which is assumed to originally exist in the population.  
110 Suppose that natural selection takes the form of viability selection, where viability is fixed from  
111 the time when the mutant allele arose in the population. We take relative viabilities of the three  
112 possible genotypes  $\mathcal{A}_1\mathcal{A}_1$ ,  $\mathcal{A}_1\mathcal{A}_2$  and  $\mathcal{A}_2\mathcal{A}_2$  at locus  $\mathcal{A}$  to be 1,  $1 - hs$  and  $1 - s$ , respectively,  
113 where  $s \in [0, 1]$  is the selection coefficient and  $h \in [0, 1]$  is the dominance parameter.

#### 114 2.1.1. Wright-Fisher diffusion with selection

115 Let us now consider the standard diffusion limit of the Wright-Fisher model with selection.  
116 We measure time in units of  $2N_0$  generations, denoted by  $t$ , where  $N_0$  is an arbitrary constant  
117 reference population size. We assume that the population size changes deterministically, with  
118  $N(t)$  denoting the number of diploid individuals in the population at time  $t$ . In the diffusion

119 limit of the Wright-Fisher model with selection, as the reference population size  $N_0$  approaches  
120 infinity, the scaled selection coefficient  $\alpha = 2N_0s$  is kept constant and the ratio of the population  
121 size to the reference population size  $N(t)/N_0$  converges to a function  $\rho(t)$ . By an argument in  
122 Durrett (2008), the allele frequency trajectory through time converges to the diffusion limit of  
123 the Wright-Fisher model if we measure time in units of  $2N_0$  generations and let the reference  
124 population size  $N_0$  go to infinity. We refer to this diffusion limit, denoted by  $X$ , as the Wright-  
125 Fisher diffusion with selection.

126 According to Durrett (2008), the Wright-Fisher diffusion  $X$  has the infinitesimal generator

$$\mathcal{G}_t = a(t, x) \frac{\partial}{\partial x} + \frac{1}{2} b(t, x) \frac{\partial^2}{\partial x^2},$$

127 with drift term

$$a(t, x) = \alpha x(1-x)((1-h) - (1-2h)x),$$

128 and diffusion term

$$b(t, x) = \frac{x(1-x)}{\rho(t)}.$$

129 The transition probability density function of the Wright-Fisher diffusion  $X$ , defined by

$$p(t, x, t', x') = \lim_{\Delta x \rightarrow 0} \frac{1}{\Delta x} \mathbb{P} \left( X(t') \in \left( x' - \frac{\Delta x}{2}, x' + \frac{\Delta x}{2} \right) \mid X(t) = x \right)$$

130 for  $t_0 \leq t < t'$ , can then be expressed as the solution  $u(t, x)$  of the corresponding KBE

$$\frac{\partial}{\partial t} u(t, x) + \mathcal{G}_t u(t, x) = 0 \tag{1}$$

131 with terminal condition  $u(t', \cdot) = \delta(\cdot - x')$ , where  $\delta$  is a Dirac delta function.

### 132 2.1.2. Conditioned Wright-Fisher diffusion with selection

133 As discussed in Valleriani (2016), it is desirable to take conditioning into account in most  
134 aDNA analyses since a single trajectory of allele frequencies through time available in aDNA  
135 results in the very limited coverage of the fitness landscape. Valleriani (2016) conditioned both  
136 the initial and the final values of the Wright-Fisher model to be fixed, assuming a finite popula-  
137 tion with perfect sampling, which is not completely realistic. In the present work, we condition

138 the Wright-Fisher diffusion  $X$  to have survived until the time of the most recent sample, *i.e.*,  
 139 the mutant allele frequency of the underlying population at the most recent sampling time point  
 140 is strictly positive.

141 We let  $X^*$  denote the Wright-Fisher diffusion  $X$  conditioned to survive, *i.e.*, the frequency  
 142 of the mutant allele stays in the interval  $(0, 1]$ , until at least time  $\tau$  after the mutant allele was  
 143 created in the population at time  $t_0$ . We define the transition probability density function of  
 144 the conditioned Wright-Fisher diffusion  $X^*$  as

$$q_\tau(t, x, t', x') = \lim_{\Delta x \rightarrow 0} \frac{1}{\Delta x} \mathbb{P} \left( X^*(t') \in \left( x' - \frac{\Delta x}{2}, x' + \frac{\Delta x}{2} \right) \mid X^*(t) = x \right) \quad (2)$$

145 for  $t_0 \leq t < t' < \tau$ . To obtain the expression of the infinitesimal generator of  $X^*$ , we need to  
 146 specify the drift term, denoted by  $a^*(t, x)$ , and the diffusion term, denoted by  $b^*(t, x)$ , which  
 147 are the first and second infinitesimal moments of the conditioned Wright-Fisher diffusion  $X^*$ ,  
 148 respectively, *i.e.*,

$$a^*(t, x) = \lim_{t' \rightarrow t} \frac{1}{t' - t} \int_0^1 (x' - x) q_\tau(t, x, t', x') dx' \quad (3)$$

$$b^*(t, x) = \lim_{t' \rightarrow t} \frac{1}{t' - t} \int_0^1 (x' - x)^2 q_\tau(t, x, t', x') dx'. \quad (4)$$

149 From Eq. (2), we can formulate the transition probability density function of the conditioned  
 150 Wright-Fisher diffusion  $X^*$  in terms of the transition probability density function of the Wright-  
 151 Fisher diffusion  $X$  as

$$q_\tau(t, x, t', x') = p(t, x, t', x') \frac{P_\tau(t', x')}{P_\tau(t, x)}, \quad (5)$$

152 where

$$P_\tau(t, x) = \mathbb{P}(X(\tau) > 0 \mid X(t) = x) \quad (6)$$

153 is the probability that the Wright-Fisher diffusion  $X$ , starting from  $x$  at time  $t$ , survives until  
 154 at least time  $\tau$ . The probability of survival,  $P_\tau(t, x)$ , for  $t_0 \leq t < \tau$  can be expressed as the  
 155 solution to the KBE in Eq. (1) with terminal condition  $P_\tau(\tau, x_\tau) = \mathbb{1}_{\{x_\tau > 0\}}$ , where  $\mathbb{1}_A$  is the  
 156 indicator function that equals to 1 if condition  $A$  holds and 0 otherwise.

157 Substituting Eq. (5) into Eqs. (3) and (4), we have

$$a^*(t, x) = \lim_{t' \rightarrow t} \frac{1}{t' - t} \int_0^1 \frac{P_\tau(t', x')}{P_\tau(t, x)} (x' - x) p(t, x, t', x') dx'$$

$$b^*(t, x) = \lim_{t' \rightarrow t} \frac{1}{t' - t} \int_0^1 \frac{P_\tau(t', x')}{P_\tau(t, x)} (x' - x)^2 p(t, x, t', x') dx'.$$

158 Taylor expansion yields

$$\frac{P_\tau(t', x')}{P_\tau(t, x)} = 1 + \left( \frac{\partial}{\partial x} \log P_\tau(t, x) \right) (x' - x) + \mathcal{O}(|t' - t|) + \mathcal{O}(|x' - x|^2),$$

159 which results in

$$a^*(t, x) = \lim_{t' \rightarrow t} \frac{1}{t' - t} \int_0^1 (x' - x) p(t, x, t', x') + \left( \frac{\partial}{\partial x} \log P_\tau(t, x) \right) (x' - x)^2 p(t, x, t', x') dx'$$

$$b^*(t, x) = \lim_{t' \rightarrow t} \frac{1}{t' - t} \int_0^1 (x' - x)^2 p(t, x, t', x') + \left( \frac{\partial}{\partial x} \log P_\tau(t, x) \right) (x' - x)^3 p(t, x, t', x') dx'.$$

160 As shown in Durrett (2008), the transition probability density function of the Wright-Fisher  
161 diffusion  $X$  satisfies

$$\lim_{t' \rightarrow t} \frac{1}{t' - t} \int_0^1 (x' - x) p(t, x, t', x') dx' = a(t, x)$$

$$\lim_{t' \rightarrow t} \frac{1}{t' - t} \int_0^1 (x' - x)^2 p(t, x, t', x') dx' = b(t, x)$$

$$\lim_{t' \rightarrow t} \frac{1}{t' - t} \int_0^1 (x' - x)^k p(t, x, t', x') dx' = 0, \quad \text{for } k \geq 3,$$

162 which gives rise to

$$a^*(t, x) = a(t, x) + b(t, x) \frac{\partial}{\partial x} \log P_\tau(t, x)$$

$$b^*(t, x) = \frac{x(1-x)}{\rho(t)}.$$

163 Therefore, the infinitesimal generator of the conditioned Wright-Fisher diffusion  $X^*$  can be  
164 written as

$$\mathcal{G}_{t,\tau}^* = a^*(t, x) \frac{\partial}{\partial x} + \frac{1}{2} b^*(t, x) \frac{\partial^2}{\partial x^2},$$



165 with drift term

$$a^*(t, x) = \alpha x(1-x)((1-h) - (1-2h)x) + \frac{x(1-x)}{\rho(t)} \frac{\partial}{\partial x} \log P_\tau(t, x), \quad (7)$$

166 and diffusion term

$$b^*(t, x) = \frac{x(1-x)}{\rho(t)}. \quad (8)$$

167 The transition probability density function of the conditioned Wright-Fisher diffusion  $X^*$  can  
168 then be expressed as the solution  $u(t, x)$  of the corresponding KBE

$$\frac{\partial}{\partial t} u(t, x) + \mathcal{G}_{t,\tau}^* u(t, x) = 0 \quad (9)$$

169 with terminal condition  $u(t', \cdot) = \delta(\cdot - x')$ .

## 170 2.2. Maximum likelihood estimation

171 Suppose that the available data are always sampled from the underlying population at a  
172 finite number of distinct time points, say  $t_1 < t_2 < \dots < t_K$ , where the time is measured in  
173 units of  $2N_0$  generations to be consistent with the time scale of the Wright-Fisher diffusion. At  
174 the sampling time point  $t_k$ , let  $c_k$  represent the number of mutant alleles observed in a sample  
175 of  $n_k$  chromosomes drawn from the underlying population. In this work, the population genetic  
176 quantities of interest are the scaled selection coefficient  $\alpha$ , the dominance parameter  $h$  and the  
177 allele age  $t_0$ .

### 178 2.2.1. Hidden Markov model

179 To our knowledge, Malaspinas et al. (2012) and Schraiber et al. (2016) are the only existing  
180 works that seek to jointly infer natural selection and allele age from time series data of allele  
181 frequencies. These two approaches were both based on the HMM framework of Bollback et al.  
182 (2008) incorporating the Wright-Fisher diffusion with selection. To jointly estimate allele age,  
183 initial conditions for the Wright-Fisher diffusion  $X$  at time  $t_0$  must be specified. Schraiber et al.  
184 (2016) took the mutant allele frequency  $X(t_0)$  to be some small but arbitrary value, which was  
185 found to be feasible in their approach but is slightly unsatisfying. Malaspinas et al. (2012) took  
186 the mutant allele frequency  $X(t_0)$  to be  $1/(2N(t_0))$ , which corresponds to the case that the  
187 positively selected allele was created as a *de novo* mutation. This can be slightly problematic

188 in that the Wright-Fisher diffusion  $X$  may hit frequency  $1/(2N(t_0))$  again after the mutation  
 189 arose, so the time  $t$  when  $X(t) = 1/(2N(t_0))$  may not be the same as the allele age.

190 Similar to Bollback et al. (2008), our approach is also built on an HMM framework except  
 191 that the underlying population evolves according to the conditioned Wright-Fisher diffusion  $X^*$   
 192 rather than the Wright-Fisher diffusion  $X$ . Given the mutant allele frequency trajectory of the  
 193 underlying population, the observations are modelled as independent binomial samples drawn  
 194 from the underlying population at every sampling time point (see Figure 1 for the graphical  
 195 representation of our HMM framework). The conditioning enables us to attach an initial con-  
 196 dition  $X^*(t_0) = 0$  with 0 forming an entrance boundary (see Supplemental Material, File S1),  
 197 *i.e.*, the conditioned Wright-Fisher diffusion  $X^*$  will reach the interval  $(0, 1]$  starting from the  
 198 initial mutant allele frequency  $X^*(t_0) = 0$ . Our setup allows us to avoid specifying any arbitrary  
 199 starting mutant allele frequency of the underlying population at time  $t_0$ .

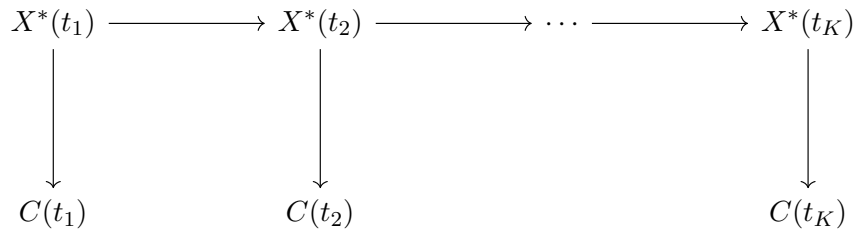

Figure 1: Graphical representation of the HMM framework for time series data of allele frequencies.

200 More specifically, our HMM framework can be fully captured by a bivariate Markov process  
 201  $\{(X^*(t), C(t)) : t \in [t_1, t_K]\}$  with initial condition  $X^*(t_0) = 0$ , where the unobserved process  
 202  $X^*(t)$  for  $t \in [t_1, t_K]$  is the Wright-Fisher diffusion conditioned to survive until the most recent  
 203 sampling time point  $t_K$ , and the observed process  $C(t)$  for  $t \in \{t_1, t_2, \dots, t_K\}$  is a sequence  
 204 of conditionally independent binomial random variables given the unobserved process  $X^*(t)$  at  
 205 each sampling time point. The transition probabilities for our HMM between two consecutive  
 206 sampling time points  $t_{k-1}$  and  $t_k$  are

$$\mathbb{P}(X^*(t_k) \in dx_k \mid X^*(t_{k-1}) = x_{k-1}; \alpha, h) = q_\tau(t_{k-1}, x_{k-1}, t_k, x_k \mid \alpha, h) dx_k$$

207 for  $k = 2, 3, \dots, K$ , where  $q_\tau(t_{k-1}, x_{k-1}, t_k, x_k \mid \alpha, h)$  is the transition probability density func-  
 208 tion of the conditioned Wright-Fisher diffusion  $X^*$  that satisfies the KBE in Eq. (9) with ter-  
 209 minal condition  $q_\tau(t_k, \cdot) = \delta(\cdot - x_k)$ . The emission probabilities for our HMM at the sampling

210 time point  $t_k$  are

$$\mathbb{P}(C(t_k) = c_k \mid X^*(t_k) = x_k; \alpha, h) = b(c_k; n_k, x_k) \quad (10)$$

211 for  $k = 1, 2, \dots, K$ , where

$$b(c_k; n_k, x_k) = \frac{n_k!}{c_k!(n_k - c_k)!} x_k^{c_k} (1 - x_k)^{n_k - c_k}.$$

### 212 2.2.2. Likelihood computation

213 To calculate the likelihood for the population genetic parameters of interest, defined by

$$\mathcal{L}(\alpha, h, t_0 \mid \mathbf{c}_{1:K}) = \mathbb{P}(C(t_1) = c_1, \dots, C(t_K) = c_K \mid \alpha, h, t_0),$$

214 we let  $\mathcal{T}_0 = (-\infty, t_1)$  and  $\mathcal{T}_{k-1} = [t_{k-1}, t_k)$  for  $k = 2, 3, \dots, K$ , and decompose the likelihood to  
215 a sum of terms according to which time interval  $\mathcal{T}_{k-1}$  the allele age  $t_0$  falls in,

$$\begin{aligned} \mathcal{L}(\alpha, h, t_0 \mid \mathbf{c}_{1:K}) &= g_0(\alpha, h, t_0 \mid \mathbf{c}_{1:K}) \mathbb{1}_{\{t_0 \in \mathcal{T}_0\}} \\ &+ \sum_{k=2}^K f_{k-1}(\alpha, h, t_0 \mid \mathbf{c}_{1:k-1}) g_{k-1}(\alpha, h, t_0 \mid \mathbf{c}_{k:K}) \mathbb{1}_{\{t_0 \in \mathcal{T}_{k-1}\}}. \end{aligned} \quad (11)$$

216 Note that in the decomposition of Eq. (11), only one term will be nonzero since the allele age  
217  $t_0$  can only be in one of the time intervals  $\mathcal{T}_{k-1}$  for  $k = 1, 2, \dots, K$ . In Eq. (11), if the allele age  
218  $t_0 \in \mathcal{T}_{k-1}$ , then

$$f_{k-1}(\alpha, h, t_0 \mid \mathbf{c}_{1:k-1}) = \mathbb{P}(C(t_1) = c_1, \dots, C(t_{k-1}) = c_{k-1} \mid \alpha, h, t_0)$$

219 is the probability of the observations sampled before the time  $t_0$  that the mutant allele arose in  
220 the underlying population, and

$$g_{k-1}(\alpha, h, t_0 \mid \mathbf{c}_{k:K}) = \mathbb{P}(C(t_k) = c_k, \dots, C(t_K) = c_K \mid \alpha, h, t_0)$$

221 is the probability of the observations sampled after the time  $t_0$  that the mutant allele was created  
222 in the underlying population. Given that the conditioned Wright-Fisher diffusion  $X^*(t) = 0$  for

223  $t \in (-\infty, t_0]$ , we have

$$f_{k-1}(\alpha, h, t_0 | \mathbf{c}_{1:k-1}) = \prod_{i=1}^{k-1} b(c_i; n_i, 0) = \prod_{i=1}^{k-1} \mathbb{1}_{\{c_i=0\}}. \quad (12)$$

224 Under our HMM framework, we have

$$g_{k-1}(\alpha, h, t_0 | \mathbf{c}_{k:K}) = \int_0^1 \cdots \int_0^1 q_\tau(t_0, 0, t_k, x_k | \alpha, h) b(c_k; n_k, x_k) \cdot \prod_{i=k+1}^K q_\tau(t_{i-1}, x_{i-1}, t_i, x_i | \alpha, h) b(c_i; n_i, x_i) dx_k \cdots dx_K.$$

225 We define

$$\beta_{k-1}(t, x | \alpha, h) = \mathbb{P}(C(t_k) = c_k, \dots, C(t_K) = c_K | X(t) = x; \alpha, h) \quad (13)$$

226 to be the probability of the observations sampled after the time  $t \in \mathcal{T}_{k-1}$  given initial condition

227  $X^*(t) = x$ , which can be calculated recursively by

$$\beta_{k-1}(t, x | \alpha, h) = \int_0^1 q_\tau(t, x, t_k, x_k | \alpha, h) b(c_k; n_k, x_k) \beta_k(t_k, x_k | \alpha, h) dx_k \quad (14)$$

228 for  $k = K, K-1, \dots, 1$ , given terminal condition

$$\beta_K(t_K, x_K | \alpha, h) = \mathbb{1}_{\{x_K > 0\}}. \quad (15)$$

229 The recursive formula in Eq. (14) implies that the probability  $\beta_{k-1}(t, x | \alpha, h)$  for  $t \in \mathcal{T}_{k-1}$  can

230 be expressed as the solution to the KBE in Eq. (9) with terminal condition

$$\beta_{k-1}(t_k, x_k | \alpha, h) = b(c_k; n_k, x_k) \beta_k(t_k, x_k | \alpha, h). \quad (16)$$

231 From Eq. (13), we have

$$g_{k-1}(\alpha, h, t_0 | \mathbf{c}_{k:K}) = \beta_{k-1}(t_0, 0 | \alpha, h) \quad (17)$$

232 for  $k = 1, 2, \dots, K$ . Substituting Eqs. (12) and (17) into Eq. (11), we can formulate the likelihood

233 for the population genetic parameters of interest as

$$\mathcal{L}(\alpha, h, t_0 \mid \mathbf{c}_{1:K}) = \beta_0(t_0, 0 \mid \alpha, h) \mathbb{1}_{\{t_0 \in \mathcal{T}_0\}} + \sum_{k=2}^{k'} \beta_{k-1}(t_0, 0 \mid \alpha, h) \mathbb{1}_{\{t_0 \in \mathcal{T}_{k-1}\}}, \quad (18)$$

234 where

$$k' = \min\{k \in \{1, 2, \dots, K\} : c_k > 0\}.$$

235 From the calculation leading to Eq. (18), the likelihood for all possible values of the allele age  
 236  $t_0$  with fixed values of the scaled selection coefficient  $\alpha$  and the dominance parameter  $h$  can be  
 237 obtained by recursively calculating the probabilities  $\beta_{k-1}(t, x \mid \alpha, h)$  for  $t \in \mathcal{T}_{k-1}$  and  $x \in [0, 1]$   
 238 for  $k = K, K-1, \dots, 1$  with Eq. (14). However, the KBE in Eq. (9) for the conditioned Wright-  
 239 Fisher diffusion  $X^*$  cannot be solved analytically. We resort to a finite difference approach like  
 240 the Crank-Nicolson scheme proposed by Crank & Nicolson (1947) to get the numerical solution  
 241 of the KBE in Eq. (9), which requires us to compute the survival probability  $P_\tau(t, x)$  in Eq. (6)  
 242 for  $t \in (-\infty, t_K]$  and  $x \in [0, 1]$ . For this, we numerically solve the KBE in Eq. (1) for the Wright-  
 243 Fisher diffusion  $X$ . We then use the values of the survival probability  $P_\tau(t, x)$  to numerically  
 244 solve the KBE in Eq. (9). Note that we take the drift term  $a^*(t, 0) = \lim_{x \downarrow 0} x \frac{\partial}{\partial x} \log P_\tau(t, x)$  to  
 245 be 1, which is justified in Supplemental Material, File S1.

246 For clarity, we write down the procedure we follow to obtain the likelihood  $\mathcal{L}(\alpha, h, t_0 \mid \mathbf{c}_{1:K})$   
 247 for all possible values of the allele age  $t_0 \in (-\infty, t_K]$  with fixed values of the scaled selection  
 248 coefficient  $\alpha$  and the dominance parameter  $h$ :

249 Step 1: Calculate  $P_\tau(t, x)$  for  $t \in (-\infty, t_K)$  and  $x \in [0, 1]$  by numerically solving the KBE in  
 250 Eq. (1) backwards in time with terminal condition  $P_\tau(t_K, x_K) = \mathbb{1}_{\{x_K > 0\}}$  for  $x_K \in [0, 1]$   
 251 and boundary conditions  $P_\tau(t, 0) = 0$  and  $P_\tau(t, 1) = 1$  for  $t \in (-\infty, t_K)$ .

252 Step 2: Calculate  $\frac{\partial}{\partial x} \log P_\tau(t, x)$  for  $t \in (-\infty, t_K)$  and  $x \in [0, 1]$  by numerically differentiating  
 253  $\log P_\tau(t, x)$ .

254 Step 3: Initialise  $\beta_K(t, x \mid \alpha, h)$  with Eq. (15).

255 Step 4: Set  $k = K$  and repeat until  $k = 2$ :

256 Step 4a: Update the terminal condition  $\beta_{k-1}(t_k, x_k \mid \alpha, h)$  with Eq. (16).

257 Step 4b: Calculate  $\beta_{k-1}(t, x \mid \alpha, h)$  for  $t \in \mathcal{T}_{k-1}$  and  $x \in [0, 1]$  by numerically solving the  
 258 KBE in Eq. (9) backwards in time with terminal condition  $\beta_{k-1}(t_k, x_k \mid \alpha, h)$  for

259  $x_k \in [0, 1]$ .

260 Step 4c: Set  $k = k - 1$ .

261 Step 5: Update the terminal condition  $\beta_0(t_1, x_1 | \alpha, h)$  with Eq. (16).

262 Step 6: Calculate  $\beta_0(t, x | \alpha, h)$  for  $t \in \mathcal{T}_0$  and  $x \in [0, 1]$  by numerically solving the KBE in  
263 Eq. (9) backwards in time with terminal condition  $\beta_0(t_1, x_1 | \alpha, h)$  for  $x_1 \in [0, 1]$  until  
264  $\int_0^1 \beta_0(t, x | \alpha, h) dx$  is sufficiently small.

265 Step 7: Combine  $\beta_{k-1}(t_0, 0 | \alpha, h)$  for  $k = 1, 2, \dots, k'$  using Eq. (18) to obtain  $\mathcal{L}(\alpha, h, t_0 | \mathbf{c}_{1:K})$ .

266 To obtain the maximum of the likelihood for the population genetic quantities of interest,  
267 we perform a section search over the scaled selection coefficient and the dominance parame-  
268 ter. We start with a fixed region for all possible values of the scaled selection coefficient and  
269 the dominance parameter. For each pair of the  $m$  equally spaced scaled selection coefficients,  
270  $\alpha_1, \alpha_2, \dots, \alpha_m$ , and the  $n$  equally spaced dominance parameters,  $h_1, h_2, \dots, h_n$ , within the re-  
271 gion, we perform the procedure laid out above to obtain the likelihood for all possible values of  
272 the allele age. We record the maximum value of the likelihood as well as the allele age where  
273 this maximum is attained. Suppose that the scaled selection coefficient  $\alpha_{i'}$  and the dominance  
274 parameter  $h_{j'}$  yield the highest likelihood amongst the combinations of the scaled selection co-  
275 efficient  $\alpha_i$  for  $i = 1, 2, \dots, m$  and the dominance parameter  $h_j$  for  $j = 1, 2, \dots, n$ . If the highest  
276 likelihood is achieved at an interior point, in the next step, we narrow our search region to  
277  $[\alpha_{i'-1}, \alpha_{i'+1}] \times [h_{j'-1}, h_{j'+1}]$ . Otherwise, *i.e.*, if the highest likelihood is achieved at a boundary  
278 point, we shift the search grid to centre at the parameters values where the likelihood achieves  
279 its maximum from the previous step. We continue this procedure until the area of the search  
280 region is sufficiently small.

### 281 2.3. Data availability

282 Supplemental material available at FigShare. Source code for the method described in this  
283 work is available at <https://github.com/zhangyi-he/WFM-1L-DiffusApprox-KBE>.

## 284 3. Results

285 In this section, we first evaluate the performance of our method through a number of simu-  
286 lated datasets with given population genetic parameter values. We then employ our approach to

287 analyse aDNA time series data of allele frequencies associated with horse coat colouration from  
288 previous studies of Ludwig et al. (2009), Pruvost et al. (2011) and Wutke et al. (2016), where  
289 eight coat colour genes from ancient horse samples ranging from a pre- to a post-domestication  
290 period were sequenced.

### 291 3.1. Analysis of simulated data

292 To assess the performance of our approach, we simulate sets of data with different population  
293 genetic parameter values. For each simulated dataset, we specify the demographic history  $N(k)$   
294 and fix the selection coefficient  $s$ , the dominance parameter  $h$  and the allele age  $k_0$ , where  $k$   
295 and  $k_0$  are measured in generations. We simulate mutant allele frequency trajectories of the  
296 underlying population using the Wright-Fisher model with selection (see, *e.g.*, Durrett, 2008)  
297 with initial frequency  $1/(2N(k_0))$ . Given the realisation of the mutant allele frequency trajectory  
298 of the underlying population, we generate the mutant allele count of the sample independently  
299 at each sampling time point according to the binomial distribution in Eq. (10). We only keep  
300 simulated datasets where the mutant allele survives in the underlying population until the time  
301 of the most recent sample.

302 As in Malaspinas et al. (2012), we consider two different sampling schemes in our empirical  
303 studies to quantify whether it is better to sample more chromosomes at fewer time points or  
304 the opposite within a given sampling period. In sampling scheme A, we draw 20 chromosomes  
305 at  $K = 60$  evenly spaced sampling time points from the underlying population, whereas in  
306 sampling scheme B, we draw 120 chromosomes at  $K = 10$  evenly spaced sampling time points.  
307 For each sampling scheme, we choose four basic demographic histories: the constant model, the  
308 bottleneck model, the growth model and the decline model, and fix the selection coefficient and  
309 the dominance parameter to several potential values:  $s \in \{0, 0.0025, 0.005, 0.01, 0.015, 0.02\}$  and  
310  $h \in \{0, 0.5, 1\}$ .

311 Due to the vastly different values of selection coefficient and dominance parameter, it is not  
312 possible to use a single set of fixed sampling times for all simulated datasets. Instead, for each  
313 pair of given values of the selection coefficient and the dominance parameter, we perform the  
314 following steps to determine the sampling time points:

315 Step 1: Generate 100 realisations of the mutant allele frequency trajectory of the underlying  
316 population through the Wright-Fisher model with selection.

317 Step 2: Take the mean of the 100 realisations of the mutant allele frequency trajectory of the  
318 underlying population.

319 Step 3: Set the time when the mean mutant allele frequency trajectory of the underlying pop-  
320 ulation first hits frequency 0.1 and 0.9 to be the first and last sampling time points,  
321 labelled  $k_1$  and  $k_K$ , respectively.

322 Step 4: Set the rest of the sampling time points  $k_2, k_3 \dots, k_{K-1}$  to be evenly spaced between  
323 the first and last sampling time points  $k_1$  and  $k_K$ .

324 Under this scheme, a significant number of the realisations of the mutant allele frequency trajec-  
325 tory of the underlying population will capture a significant proportion of the selective sweep. See  
326 Figures 2 and 3 for the simulated datasets under constant and bottleneck demographic histories  
327 for each sampling scheme with their corresponding likelihood surfaces produced through our  
328 approach as representative examples. Note that in what follows we set the reference population  
329 size  $N_0 = 16000$  unless otherwise noted

### 330 *3.1.1. Power to infer natural selection and allele age*

331 We first test the accuracy of our approach across different parameter values and sampling  
332 schemes under a constant demographic history, where  $N(k) = 16000$  for  $k \in \mathbb{Z}$ . We present the  
333 boxplot results for the resulting estimates for these simulated datasets across different parameter  
334 values and sampling schemes in Figure 4. The tips of the whiskers represent the 2.5%-quantile  
335 and the 97.5%-quantile, and the boxes denote the first and third quartiles with the median in  
336 the middle. We summarise the bias and the root mean square error (RMSE) of the resulting  
337 estimates in Supplemental Material, Tables S1-S3.

338 As can be observed from Figure 4, our estimates for the selection coefficient and the allele  
339 age both show little bias across different parameter values and sampling schemes, although  
340 one can discern a slight positive bias for the estimates of the allele age. Given that there is no  
341 requirement for the maximum likelihood estimator to be unbiased in general, some degree of bias  
342 is not unexpected. An additional cause of the bias arises from the finite grid size (*i.e.*, the state  
343 space  $[0, 1]$  is divided into 270 subintervals) used when we numerically solve the KBE in Eq. (9)  
344 through the Crank-Nicolson approach. Numerically solving the KBE with a finer grid results  
345 in a smaller bias, although the numerical solution takes much longer to run. With the increase  
346 of the selection coefficient, the uncertainty of the estimate for the selection coefficient increases



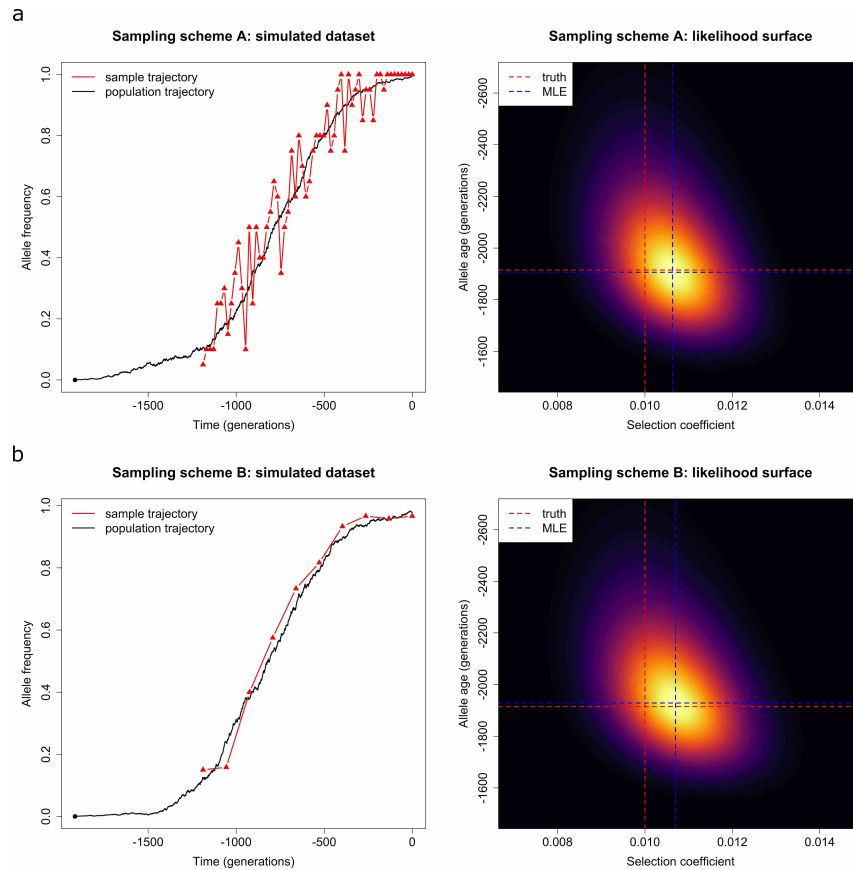

Figure 2: Representative examples of the datasets simulated under a constant demographic history for every sampling scheme with their resulting likelihood surfaces. We take the selection coefficient to be  $s = 0.01$  and the dominance parameter to be  $h = 0.5$ . We set the population size to  $N(k) = 16000$  for  $k \in \{-1915, -1914, \dots, 0\}$ . The mutant allele is created at frequency  $x_0 = 3.125 \times 10^{-5}$  in the underlying population at time  $k_0 = -1915$  (black filled circle), and the mutant allele frequency trajectory of the underlying population is simulated through the Wright-Fisher model with selection (black line). (a) Sampling scheme A: 20 chromosomes drawn from the underlying population every 20 generations (red filled triangle) from generation -1188 to 0. (b) Sampling scheme B: 120 chromosomes drawn from the underlying population every 132 generations (red filled triangle) from generation -1188 to 0.

347 whereas the uncertainty of the estimate for the allele age decreases. This can be explained by  
 348 the relatively smaller noise with larger selection coefficients, yielding more information about  
 349 the mutant allele frequency trajectory of the underlying population prior to the first sample  
 350 time point. Moreover, the 2.5%-quantiles of the empirical distributions of the estimates for the  
 351 selection coefficient  $s > 0$  are all larger than the 97.5%-quantile of the empirical distribution  
 352 of the estimates for the selection coefficient  $s = 0$  (*i.e.*, *selective neutrality*, see Supplemental  
 353 Material, Figure S1), which implies that our method has a strong power to reject neutrality.

354 Comparing boxplot results for different selection schemes, we find that there are many more  
 355 outliers found in the case of recessive selection ( $h = 1$ , Figure 4c) than in the cases of dominant  
 356 and genic selection ( $h = 0$  and  $h = 0.5$ , Figures 4a and 4b). To understand this effect, we plot in

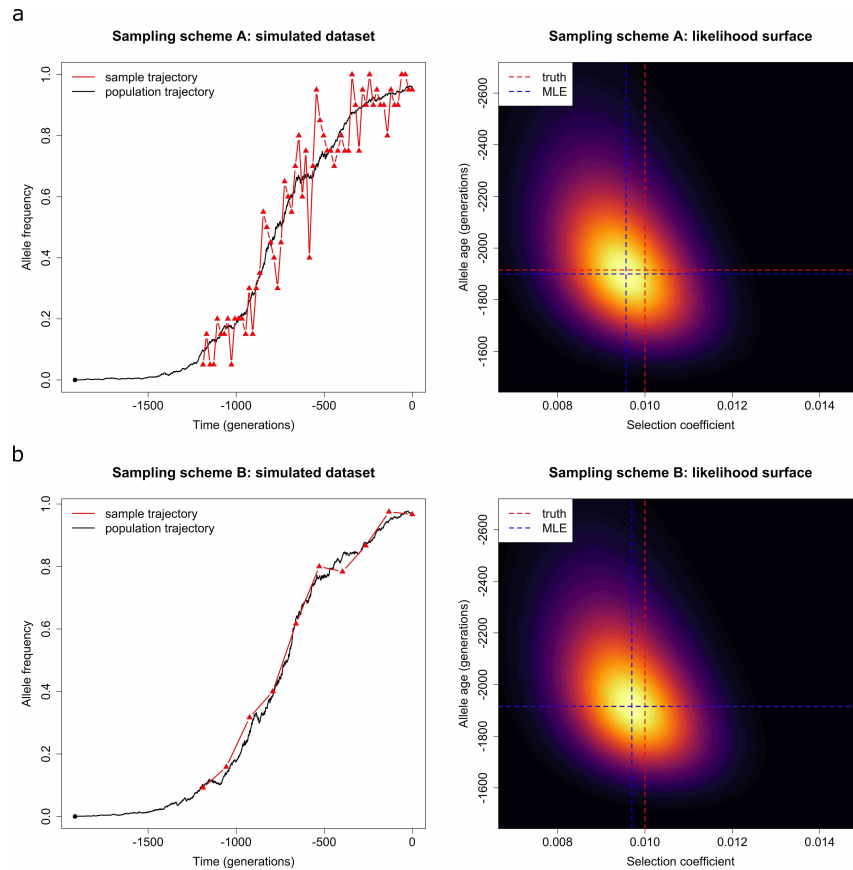

Figure 3: Representative examples of the datasets simulated under a bottleneck demographic history for every sampling scheme with their resulting likelihood surfaces. We simulate the mutant allele frequency trajectory of the underlying population according to the Wright-Fisher model with selection, where the population size is taken to be  $N(k) = 8000$  for  $k \in \{-1436, -1435, \dots, -957\}$  and  $N(k) = 16000$  otherwise, and the rest of the parameters are the same as those in Figure 2.

357 Figure 5 realisations of mutant allele frequency trajectories of the underlying population for all  
358 simulated datasets. To capture information on selection coefficient and allele age, the underlying  
359 mutant allele frequency trajectory should ideally grow from a lower frequency around 0 to a  
360 high frequency around 1 within the sampling period. However, as can be seen in Figure 5, there  
361 are a number of simulated mutant allele frequency trajectories of the underlying population  
362 where the mutant allele frequencies at all sampling time points are all close to the absorbing  
363 boundaries, 0 or 1. This effect is especially pronounced for the case of recessive selection ( $h = 1$ ).  
364 Such mutant allele frequency trajectories of the underlying population contain little information  
365 about the underlying selection coefficient and allele age, therefore more outliers when we try to  
366 estimate these parameters.

367 Comparing boxplot results under different sampling schemes, we can observe similar results  
368 for estimates of the selection coefficient and the allele age, which suggests that within a given

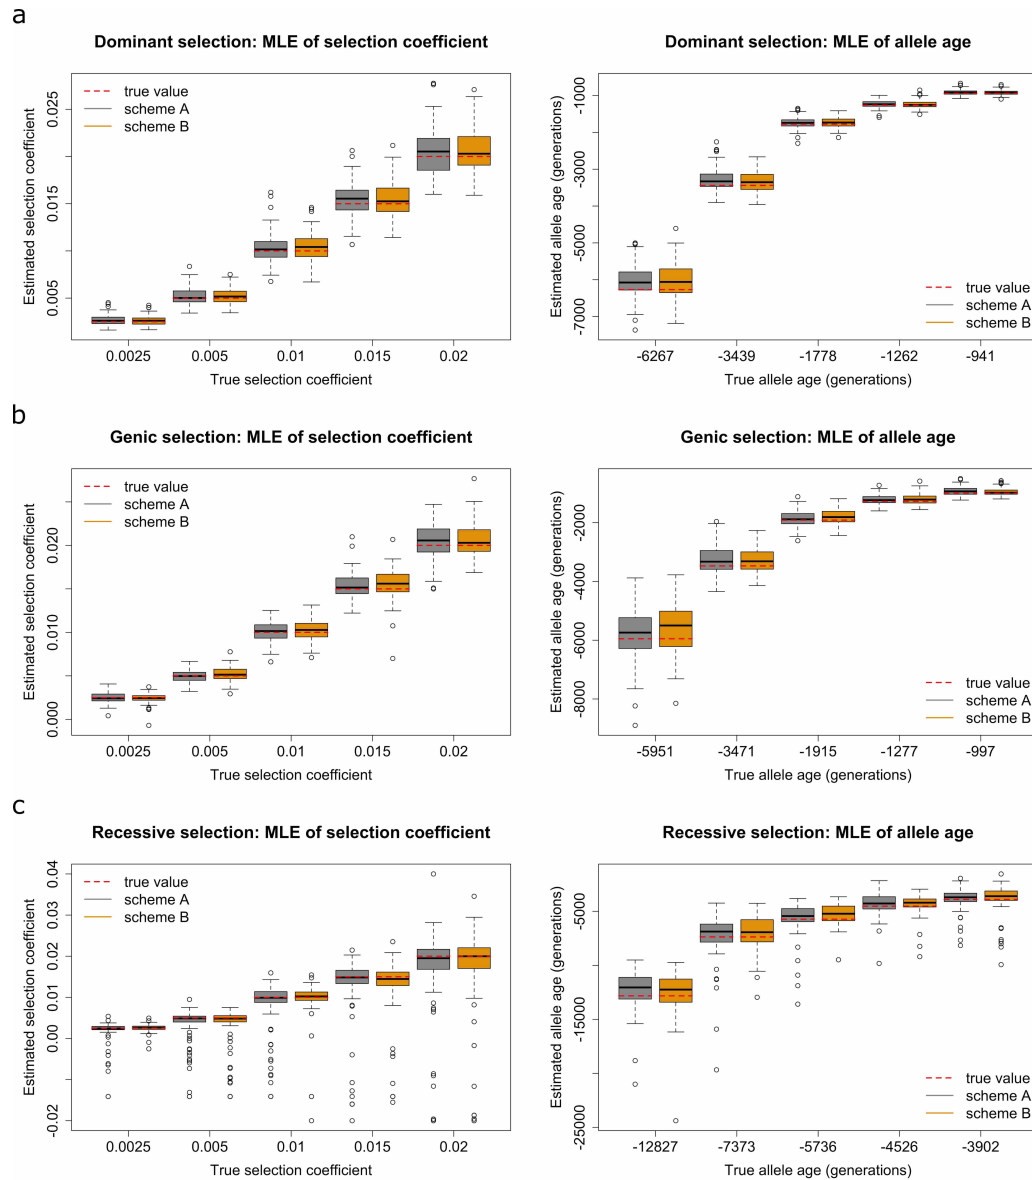

Figure 4: Empirical distributions of estimates for 100 datasets simulated under a constant demographic history with population size  $N(k) = 16000$  for  $k \in \{k_0, k_0 + 1, \dots, 0\}$ . Grey boxplots represent the estimates produced for sampling scheme A, and yellow boxplots represent the estimates produced for sampling scheme B. Boxplots of the estimates for (a) dominant selection ( $h = 0$ ) (b) genic selection ( $h = 0.5$ ) (c) recessive selection ( $h = 1$ ).

369 sampling period, sampling more chromosomes at fewer time points or the opposite has little  
 370 effect on the inference of natural selection and allele age. We also present the empirical distribu-  
 371 tions of the estimates for the selection coefficient and the allele age obtained from the samples  
 372 sparsely distributed in time with small uneven sizes in Supplemental Material Figure S2, with  
 373 their bias and RMSE summarised in Supplemental Material Table S4. These results further  
 374 establish the ability of our method to handle data generated under any sampling schemes even  
 375 if samples are sparsely distributed in time with small uneven sizes.

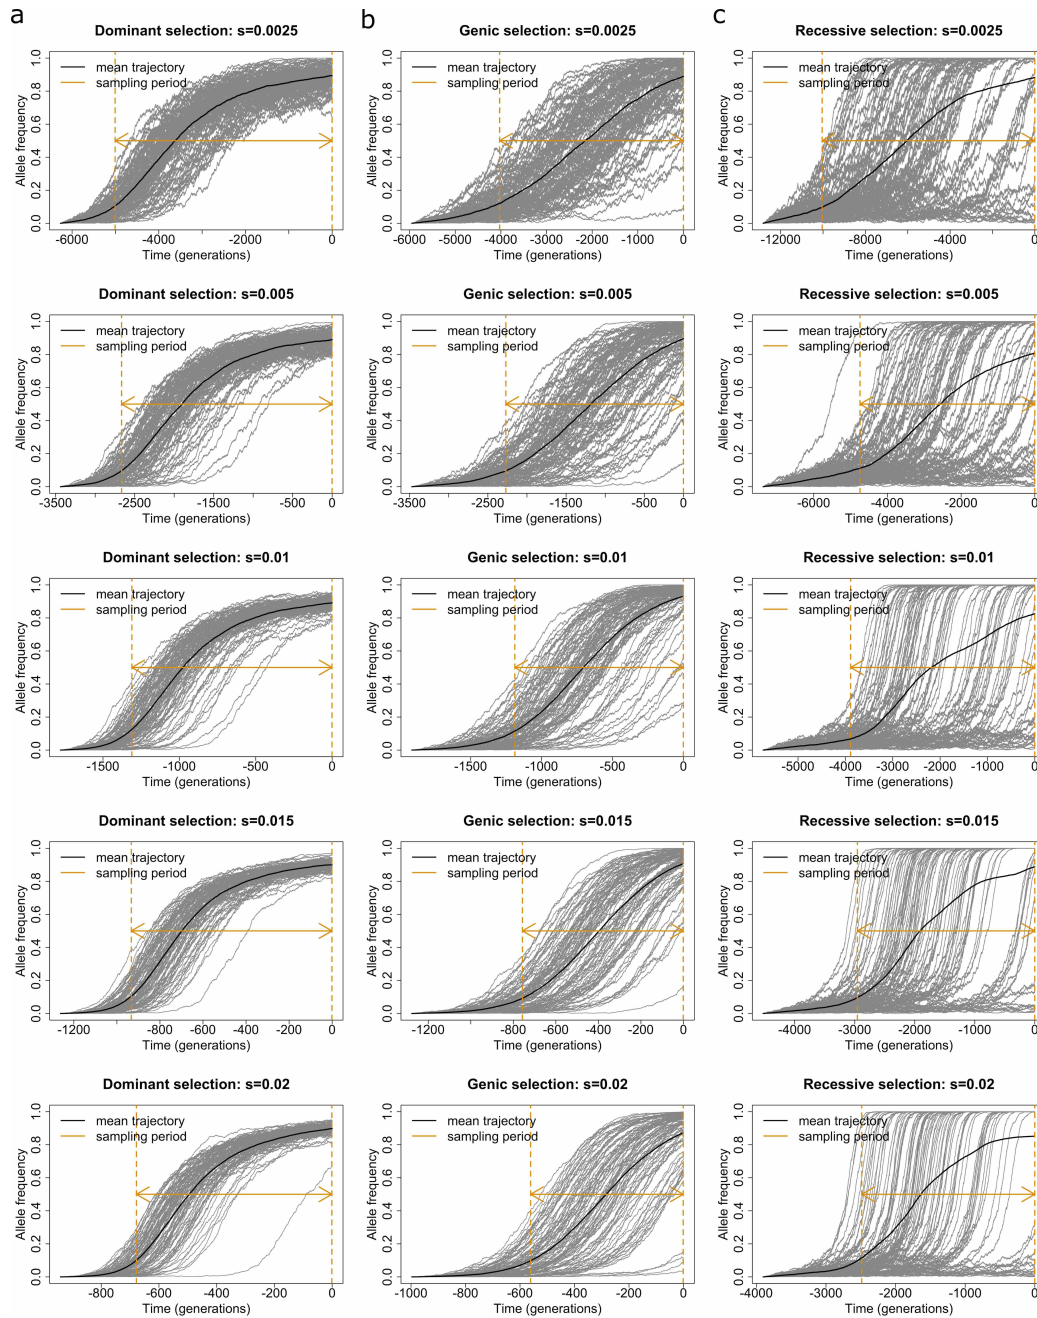

Figure 5: Mutant allele frequency trajectories of the underlying population for the datasets simulated under a constant demographic history with population size  $N(k) = 16000$  for  $k \in \{k_0, k_0 + 1, \dots, 0\}$ , and dominant parameter (a)  $h = 0$  (dominant selection) (b)  $h = 0.5$  (genic selection) (c)  $h = 1$  (recessive selection).

376 We now assess the performance of our method across different parameter values and sampling  
 377 schemes under non-constant demographic histories and compare the results of the inference with  
 378 and without taking demographic history into account. The resulting boxplots of the empirical  
 379 studies under a bottleneck demographic history are illustrated in Figure 6 (the grey boxes),  
 380 where the population size is taken to be  $N(k) = 8000$  for  $k \in \{[k_0/2], [k_0/2] + 1, \dots, [3k_0/4]\}$

381 and  $N(k) = 16000$  otherwise. The bias and RMSE of the resulting estimates are summarised in  
 382 Supplemental Material, Table S5. In order to investigate the effect of the demographic history  
 383 on the inference results, we also present the boxplot results produced without incorporating the  
 384 true demographic history in Figure 6 (the yellow boxes), where we fix the population size to be  
 385 the bottleneck population size  $N(k) = 8000$  for  $k \in \{k_0, k_0 + 1, \dots, 0\}$ , with all other settings  
 386 being identical to the empirical studies for the bottleneck demographic history. The bias and  
 387 the RMSE of the resulting estimates are summarised in Supplemental Material, Table S6.

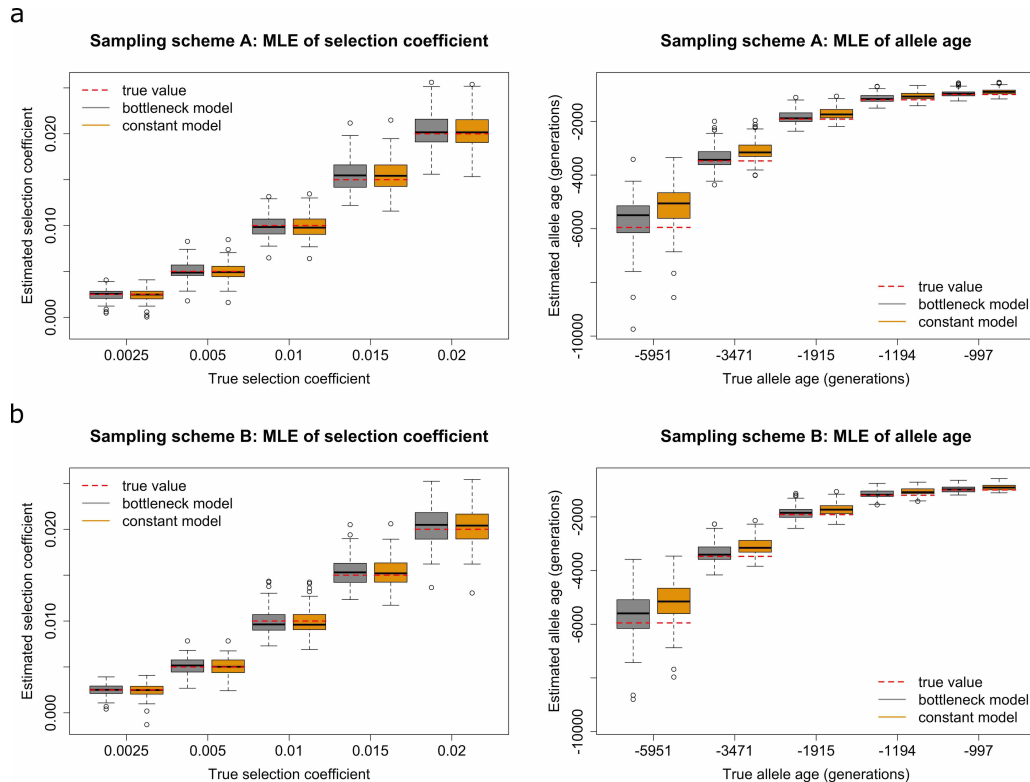

Figure 6: Empirical distributions of estimates for 100 datasets simulated under a bottleneck demographic history with population size  $N(k) = 8000$  for  $k \in \{[k_0/2], [k_0/2] + 1, \dots, [3k_0/4]\}$  and  $N(k) = 16000$  otherwise, and dominance parameter  $h = 0.5$ . Grey boxplots represent the estimates assuming the true demographic history, and yellow boxplots assuming a constant demographic history with the bottleneck population size  $N(k) = 8000$  for  $k \in \{k_0, k_0 + 1, \dots, 0\}$ . Boxplots of the estimates for (a) sampling scheme A (b) sampling scheme B.

388 As illustrated in Figure 6, we find that our estimates for the selection coefficient and the  
 389 allele age under the bottleneck demographic history are both reasonably accurate across differ-  
 390 ent parameter values and sampling schemes when we incorporate the true demographic history.  
 391 They are very similar to the estimates in the empirical studies under the constant demographic  
 392 history shown in Figure 4. Comparing the boxplot results produced with and without consider-  
 393 ing demographic histories, we observe that incorporating true demographic histories has little

394 effect on the estimation of natural selection. This is consistent with the findings of Jewett et al.  
395 (2016) that accurate estimates of the selection coefficient could often be obtained by assuming  
396 that alleles evolve without genetic drift in a population of infinite size.

397 As can be seen in Figure 6, however, ignoring true demographic histories can cause significant  
398 biases in estimating the allele age. We will give an intuitive explanation for why this bias occurs.  
399 In this simulation study, the earliest true population size is 16000, but the inference results  
400 ignoring demographic history takes the population size to be always 8000, half as large as the  
401 true value for early times. If we take the reference population size to be  $N_0 = 16000$  under both  
402 scenarios, the drift term  $a^*(t, x)$  in Eq. (7) under the assumption of the constant population  
403 size of 8000 will have  $\rho(t) = 1/2$  for early times, larger than the drift term  $a^*(t, x)$  if  $\rho(t) = 1$   
404 under the true population size of 16000. This extra upward drift causes  $X^*$ , the conditioned  
405 frequency of the mutant allele, to increase more rapidly than what actually happens under  
406 true demographic history. Therefore, the resulting estimates of the allele age are smaller than  
407 the true allele age. A similar conclusion can be reached from other non-constant demographic  
408 histories. See the empirical distributions of the estimates under growth and decline demographic  
409 histories in Supplemental Material Figures S3 and S4, with their bias and RMSE summarised in  
410 Supplemental Material, Tables S7-S10, where we take the population size to be  $N(k) = 16000$   
411 for  $k \in \{k_0, k_0 + 1, \dots, [k_0/2]\}$  and  $N(k) = 32000$  otherwise for the growth demographic history  
412 and the population size to be  $N(k) = 100000$  for  $k \in \{k_0, k_0 + 1, \dots, [k_0/2]\}$  and  $N(k) = 16000$   
413 otherwise for the decline demographic history. The boxplots of the resulting estimates for the  
414 case of selective neutrality ( $s = 0$ ) under non-constant demographic histories can be found in  
415 Supplemental Material, Figure S5.

416 In summary, our approach can deliver accurate joint estimates of the selection coefficient  
417 and the allele age from time series data of allele frequencies across different parameter values,  
418 demographic histories and sampling schemes, even if the samples are sparsely distributed in time  
419 with small uneven sizes. Our empirical studies show that ignoring true demographic histories  
420 has minimal impact on the inference of natural selection but significantly alters the estimation  
421 of allele age. We also find that within any given sampling period, drawing more chromosomes  
422 at fewer time points or the opposite has little effect on the estimation of the selection coefficient  
423 and the allele age. In all these empirical studies above, the dominance parameter is treated as

424 known. We also present the results where the dominance parameter is estimated along with the  
425 selection coefficient and the allele age (see Supplemental Material, Table S11).

### 426 *3.1.2. Comparison with existing methods*

427 We compare the performance of our method with the approach of Schraiber et al. (2016). To  
428 our knowledge, Schraiber et al. (2016) is the only existing method that allows for the joint infer-  
429 ence of natural selection and allele age from time series data of allele frequencies while different  
430 demographic histories can be explicitly incorporated. We apply their approach to re-analyse the  
431 datasets generated under different demographic histories in Section 3.1.1. Following Schraiber  
432 et al. (2016), we run their MCMC method with 1000000 iterations for each simulated dataset,  
433 sampling every 1000 iterations to get 1000 MCMC samples and then discard the first 500 sam-  
434 ples as burn-in period. We show the results of both approaches under the constant demographic  
435 history in Figure 7 and leave the results under non-demographic histories in Supplemental Ma-  
436 terial, Figures S6-S8. The bias and RMSE of the estimates are summarised in Supplemental  
437 Material, Tables S12-S15. The empirical distributions of estimates in the case of the selection  
438 coefficient  $s = 0$  under different demographic histories are illustrated in Supplemental Material,  
439 Figure S9.

440 As shown in Figure 7, the method of Schraiber et al. (2016) performs well for the estimation  
441 of the selection coefficient under the constant demographic history when the selection coefficient  
442 is small. However, their method shows an increasing trend of underestimation when the selec-  
443 tion coefficient is large. Similar results can be found in the performance studies presented in  
444 Schraiber et al. (2016). For the allele age, the approach of Schraiber et al. (2016) overestimates  
445 its absolute value under the constant demographic history.

446 In comparison, for all positive selection coefficients, our method performs significantly better  
447 in estimating both selection coefficient and allele age under the constant demographic history.  
448 Our approach produces reasonably accurate estimates with smaller bias and RMSE across dif-  
449 ferent parameter values and sampling schemes. Non-constant demographic histories cause some  
450 deterioration in the performance of our procedure, *i.e.*, larger bias and RMSE in comparison to  
451 those under the constant demographic history, but not as much as with the method of Schraiber  
452 et al. (2016) (see Supplemental Material, Figures S6-S8 and Tables S12-S15). Indeed, the worst  
453 performance of our approach occurs in the case of selective neutrality ( $s = 0$ ) (see Supplemental

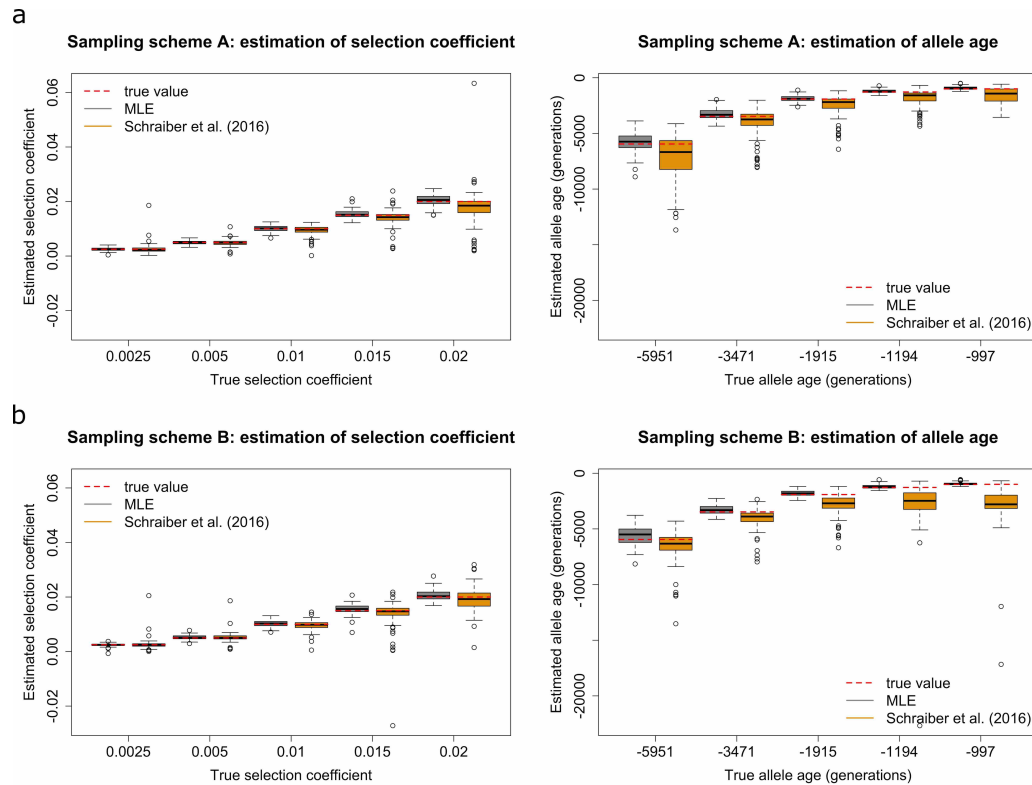

Figure 7: Empirical distributions of estimates for 100 datasets simulated under a constant demographic history with population size  $N(k) = 16000$  for  $k \in \{k_0, k_0 + 1, \dots, 0\}$  and dominance parameter  $h = 0.5$ . Grey boxplots represent the estimates produced with our method, and yellow boxplots using the approach of Schraiber et al. (2016). Boxplots of the estimates for (a) sampling scheme A (b) sampling scheme B.

454 Material, Figure S9). This can be explained by the following: all else being equal, mutant allele  
 455 frequency trajectories of the underlying population with larger selection coefficients have less  
 456 noise and hence more information than smaller selection coefficients.

457 In summary, for positive selection coefficients, our approach is significantly more accurate  
 458 across different parameter values, demographic histories and sampling schemes, when compared  
 459 to the approach of Schraiber et al. (2016). The performance of the method of Schraiber et al.  
 460 (2016) is also heavily influenced by the demographic history and the sampling scheme.

### 461 3.2. Analysis of real data

462 We show the utility of our approach on real data by re-analysing the aDNA data associated  
 463 with horse coat colouration. Ludwig et al. (2009) sequenced 89 ancient horse samples at eight  
 464 genes encoding coat colouration, which were obtained from Siberia, Middle and Eastern Europe,  
 465 China and the Iberian Peninsula, ranging from a pre- to a post-domestication period. Ludwig  
 466 et al. (2009) applied the method of Bollback et al. (2008) and found two of these genes, *ASIP*



467 and *MC1R*, which showed strong fluctuations in the mutant allele frequencies of the sample,  
468 to be likely selectively advantageous. Malaspinas et al. (2012), Steinrücken et al. (2014) and  
469 Schraiber et al. (2016) then re-analysed the same aDNA data for *ASIP* and *MC1R* with their  
470 approaches incorporating more complex evolutionary scenarios.

471 We re-analyse the aDNA data for *ASIP* and *MC1R* from Wutke et al. (2016), which contains  
472 107 ancient horse samples sequenced at eight genes encoding coat colouration by them along  
473 with 94 sequenced ancient horse samples from the previous studies of Ludwig et al. (2009)  
474 and Pruvost et al. (2011). From Der Sarkissian et al. (2015), we take the average length of a  
475 generation of the horse to be eight years and show the changes in the mutant allele frequencies  
476 of the sample for *ASIP* and *MC1R* through successive generations in Figures 8a and b. As in  
477 Schraiber et al. (2016), we apply our method to infer natural selection and allele age for *ASIP*  
478 and *MC1R* by explicitly incorporating the horse demographic history of Der Sarkissian et al.  
479 (2015), as illustrated in Figure 8c, with the most recent population size  $N_0 = 16000$  being the  
480 reference population size. In addition, we set the dominance parameter to  $h = 1$  in our analysis  
481 as the mutant alleles at the *ASIP* and *MC1R* loci are both recessive (Rieder et al., 2001).

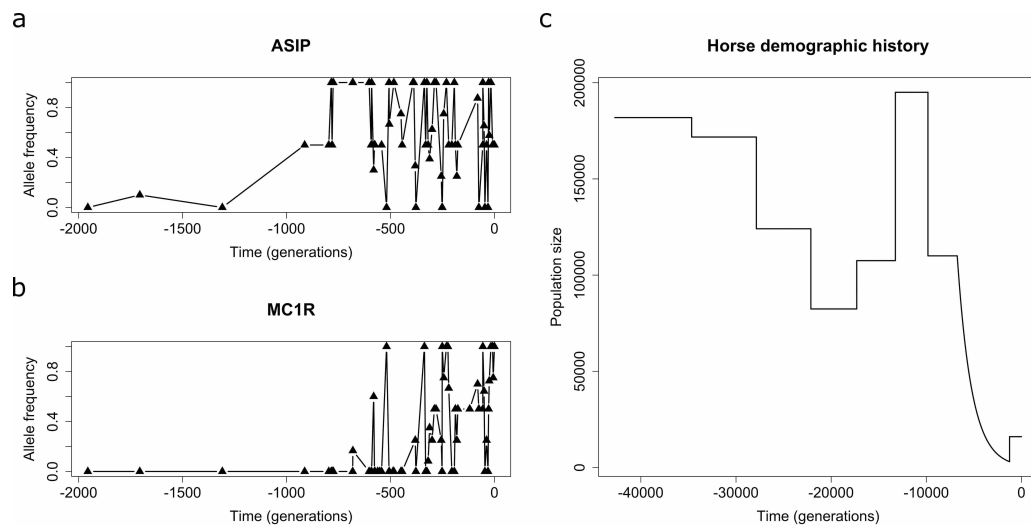

Figure 8: Ancient horse samples sequenced at *ASIP* and *MC1R* from Wutke et al. (2016). Temporal changes in the mutant allele frequencies of the sample for (a) *ASIP* and (b) *MC1R*. (c) Horse demographic history of Der Sarkissian et al. (2015).

482 We illustrate the resulting likelihood surface for the *ASIP* gene in Figure 9a and find that the  
483 likelihood surface attains its maximum at 0.0013 for the selection coefficient and  $-42982$  for the  
484 allele age, *i.e.*, 42982 years before present (BP). Our results suggest that the mutation in *ASIP*  
485 was favoured by natural selection and was created in the Pleistocene, which lasted from about

486 2580000 to 11700 years BP (Cohen et al., 2013). To establish the significance of our findings, we  
487 compute the corresponding 95% confidence intervals (CI's) with a bootstrap procedure called  
488 case resampling (Efron & Tibshirani, 1994), where we resample with replacement from the 62  
489 time stamped samples in the *ASIP* dataset to form the bootstrap samples. More specifically,  
490 we sample with replacement from the 62 sampling time points, which generates exactly 62  
491 time points that may have duplicates. If a certain time point with the observation  $(n_k, c_k)$  is  
492 duplicated  $m$  times in the resampled time points, the bootstrap observation associated with  
493 this time point is  $(mn_k, mc_k)$ . The 95% CI is  $[0.0004, 0.0022]$  for the selection coefficient and  
494  $[-175272, -18749]$  for the allele age, respectively, where the 95% CI's are constructed as the  
495 interval between 2.5th and 97.5th percentiles of the estimates for the 1000 bootstrap replicates.  
496 This presents further evidence that the mutation in *ASIP* was positively selected and arose in  
497 the Middle Pleistocene (lasted from about 773000 to 126000 years BP) or Upper Pleistocene  
498 (lasted from about 126000 to 11700 years BP).

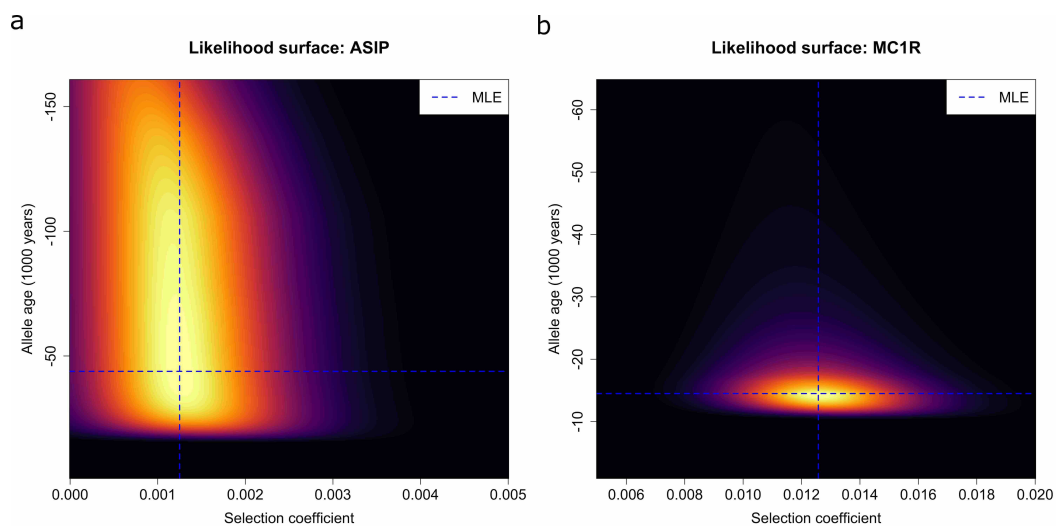

Figure 9: Likelihood surfaces produced under the non-constant demographic history of Der Sarkissian et al. (2015) for (a) *ASIP* and (b) *MC1R*.

499 The resulting likelihood surface for the *MC1R* gene is illustrated in Figure 9b. Our estimate  
500 of the selection coefficient is 0.0126 with the 95% CI  $[0.0091, 0.0176]$ , which indicates that the  
501 mutation in *MC1R* was selectively advantageous. Our estimate of the allele age is  $-13645$  with  
502 the 95% CI  $[-15430, -12866]$ , which suggests that the mutation in *MC1R* was created in the  
503 Upper Pleistocene.

504 It should be noted that one uncertainty our bootstrap procedure does not take into account

505 is that of the underlying demographic history. The demographic history of Der Sarkissian et al.  
506 (2015) is an estimate, but we take this to be fixed in our bootstrap procedure. Therefore, the  
507 confidence intervals we state above are likely to be narrower than if we have taken into account  
508 the further uncertainty in the underlying demographic history.

509 In summary, our findings suggest that *ASIP* and *MC1R* mutations arose in the Pleistocene  
510 and have both been favoured by natural selection. The climate of the Pleistocene saw dramatic  
511 changes and included the Last Glacial Maximum (LGM), the coldest phase of the Last Glacial  
512 Period (LGP), which lasted from approximately 26500 years BP to 19000 to 20000 years BP  
513 (Clark et al., 2009). Our results are weak evidence supporting *ASIP* mutations being created  
514 before the LGM (but with probability 0.8), and strong evidence supporting *MC1R* mutations  
515 being created after the LGM.

516 We also present the results under two different constant demographic histories: the first with  
517 constant population size 16000, the most recent population size, and the second with constant  
518 population size 2500, the bottleneck population size. These results are illustrated in Figures 10  
519 and 11, respectively, with their maximum likelihood estimates and 95% CIs summarised in  
520 Supplemental Material, Tables S16. With constant population sizes of both 16000 and 2500, we  
521 find strong evidence to support that *ASIP* and *MC1R* mutations are both positively selected.  
522 The estimates of the selection coefficient are similar to those produced under the demographic  
523 history of Der Sarkissian et al. (2015), but the estimates of the allele age display large variability  
524 under different demographic histories. We find that *ASIP* mutations were created during the  
525 LGM with constant population size 2500, and *MC1R* mutations were created during the LGM  
526 with constant population size 16000, which are in conflict with earlier results obtained under  
527 the demographic history of Der Sarkissian et al. (2015). This again demonstrates that changing  
528 the underlying demographic history can significantly alter estimates of the allele age.

### 529 *3.3. Computational issues*

530 We apply the Crank-Nicolson scheme proposed by Crank & Nicolson (1947) to numerically  
531 solve the KBE's in Eqs. (1) and (9). To achieve higher computational accuracy of the numerical  
532 solution, it is desirable to increase the number of grid points in the Crank-Nicolson approach,  
533 which however becomes burdensome computationally. We adopt a grid that is logarithmically  
534 divided close to 0 and 1, and such a partition increases the number of grid points at the two

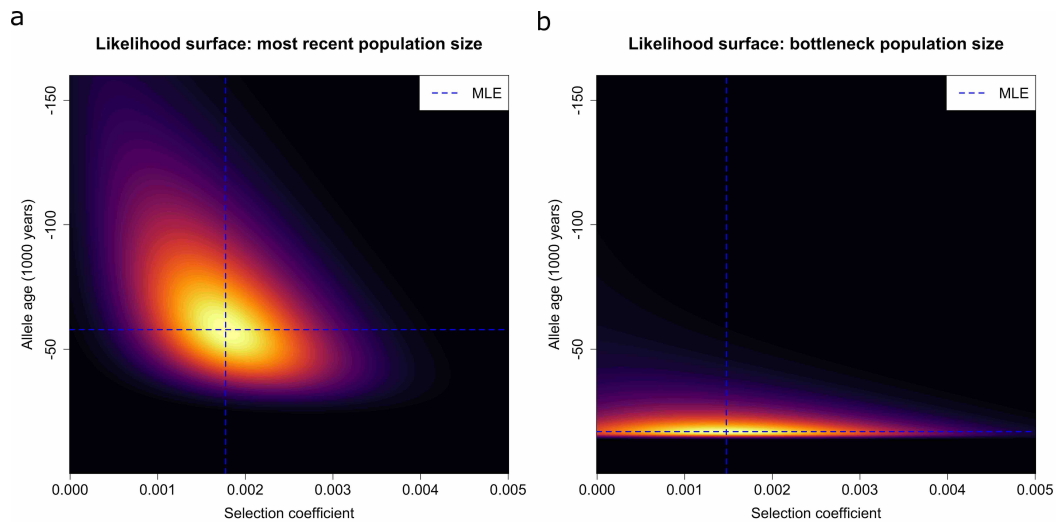

Figure 10: Likelihood surfaces for *ASIP* produced under the constant demographic history with (a) the most recent population size of 16000 and (b) the bottleneck population size of 2500.

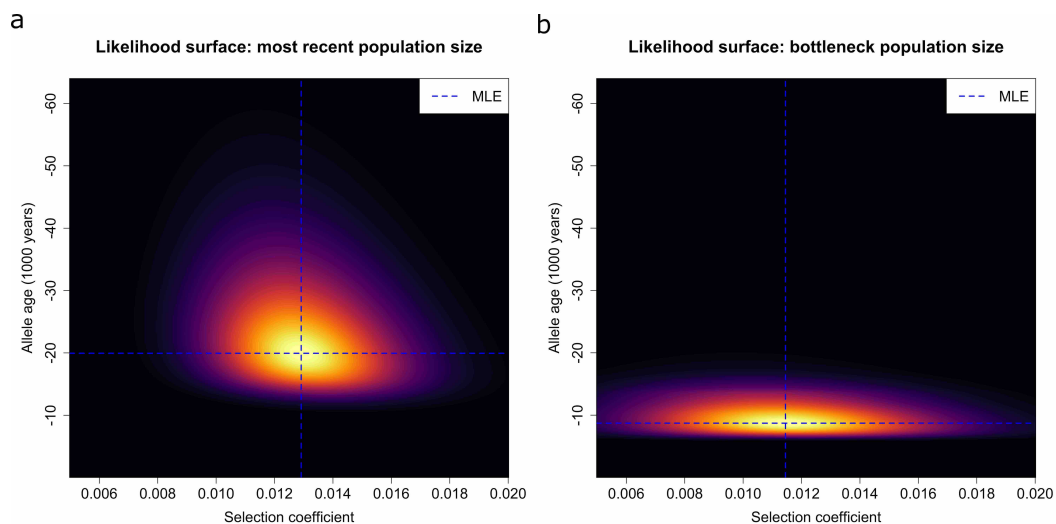

Figure 11: Likelihood surfaces for *MC1R* produced under the constant demographic history with (a) the most recent population size of 16000 and (b) the bottleneck population size of 2500.

535 ends of the state space  $[0, 1]$ . More specifically, in our analysis we use the grid for the state space  
536  $[0, 1]$  that is uniformly divided in  $[0.03, 0.97]$  with 30 subintervals and logarithmically divided  
537 in  $[0, 0.03]$  and  $[0.97, 1]$  with 120 subintervals each. To achieve the maximum of the likelihood  
538 surface for the selection coefficient and the allele age, we start the section search on the selection  
539 coefficient with 7 equally spaced selection coefficients within a fixed interval  $[-0.02, 0.04]$ .

540 In our analysis of *ASIP* and *MC1R*, a single run for a fixed value of the selection coefficient  
541 takes about 54 seconds for *MC1R* on a single core of an Intel Core i7 processor at 3.5 GHz,  
542 whereas the same run takes approximately 84 seconds for *ASIP*. The entire maximum likelihood

543 estimation procedure for *MC1R* takes 905 seconds, whereas this procedure for *ASIP* takes 1728  
544 seconds. All of our code in this work is written in R.

#### 545 4. Discussion

546 In this work, we developed a novel likelihood-based method for co-estimating selection co-  
547 efficient and allele age from time series data of allele frequencies under different demographic  
548 histories in this work. To our knowledge, Malaspinas et al. (2012) and Schraiber et al. (2016) are  
549 the only existing methods that can jointly infer natural selection and allele age from time series  
550 data of allele frequencies. Our key innovation is that we take the Wright-Fisher diffusion condi-  
551 tioned to survive until at least the time of the most recent sample to be the underlying process  
552 in the HMM framework and calculate the likelihood by numerically solving the KBE resulting  
553 from the conditioned Wright-Fisher diffusion backwards in time. For every fixed value of the  
554 selection coefficient, we need to numerically solve the KBE only once to obtain the likelihood  
555 for all possible values of the allele age. Our backwards-in-time likelihood recursion reduces the  
556 two-dimensional numerical search for the maximum of the likelihood surface for the selection  
557 coefficient and the allele age, *e.g.*, as used in Malaspinas et al. (2012), to a one-dimensional nu-  
558 merical search over the selection coefficient. Thus, our method can achieve the joint estimates  
559 of the selection coefficient and the allele age relatively quickly, *e.g.*, about 1728 and 905 seconds  
560 for *ASIP* and *MC1R* from ancient horse samples, respectively. Furthermore, the conditioned  
561 Wright-Fisher diffusion incorporated into our HMM framework allows us to avoid the somewhat  
562 arbitrary initial condition that the allele is created by mutation at a certain low frequency, *e.g.*,  
563 as used in Malaspinas et al. (2012) and Schraiber et al. (2016).

564 We demonstrated through simulated data that our estimates for both the selection coefficient  
565 and the allele age were accurate under a given demographic history while the likelihood surfaces  
566 were smooth with a shape that coincided with our intuitive understanding of our approach. Even  
567 though the samples are sparsely distributed in time with small uneven sizes, our method still  
568 performed well, which is an important feature for aDNA. Our simulation studies also illustrated  
569 that ignoring demographic histories had minimal impact on the inference of natural selection  
570 but significantly biased the estimation of allele age. In addition, we investigated the impact of  
571 the sampling scheme on the inference of natural selection and allele age, showing that within  
572 any given sampling period, drawing more chromosomes at fewer time points or the opposite had

573 little effect on the estimation of selection coefficient and allele age. Compared to the method of  
574 Schraiber et al. (2016), our approach is superior for the estimation of selection coefficient and  
575 allele age in accuracy across different parameter values, demographic histories and sampling  
576 schemes.

577 We re-analysed the genes that have been well studied in previous studies of Ludwig et al.  
578 (2009), Malaspinas et al. (2012), Steinrücken et al. (2014) and Schraiber et al. (2016), *ASIP* and  
579 *MC1R*, with the expanded aDNA dataset from Wutke et al. (2016). We found strong evidence  
580 for weak positive selection acting on the *ASIP* gene and strong positive selection acting on the  
581 *MC1R* gene, which was similar to those reported by Ludwig et al. (2009), Steinrücken et al.  
582 (2014) and Schraiber et al. (2016). In contrast, Malaspinas et al. (2012) did not have sufficient  
583 resolution to distinguish positive selection from negative selection for *ASIP* with their approach  
584 from the same aDNA data as analysed in Ludwig et al. (2009). Also, the findings of Malaspinas  
585 et al. (2012) suggested that the allele age of *ASIP* mutations ranged from 20000 to 13100 years  
586 BP, which was significantly different from our estimate. Such a discrepancy could be caused by  
587 different demographic histories, insufficient amounts of data, or improperly grouped samples.  
588 Steinrücken et al. (2014) and Schraiber et al. (2016) also inferred the model of natural selection,  
589 which we take to be fixed in our analysis with mutant allele homozygotes at both *ASIP* and  
590 *MC1R* being recessive. However, thanks to the computational advantages of our approach, it  
591 can be readily applied to infer parameters in a model of general diploid natural selection: for  
592 example, by running a two-dimensional numerical search over the selection coefficient and the  
593 dominance parameter to find the maximum of the likelihood. Our method can also be extended  
594 for fluctuating selection coefficients by combining the KBE's for different population genetic  
595 parameters at the change time points suitably. Even though we have only illustrated the utility  
596 of our method on aDNA data in this work, our approach can also be used to analyse time series  
597 data of allele frequencies from laboratory experiments (*e.g.*, Lang et al., 2013; Wisser et al., 2013;  
598 Burke et al., 2014; Le Bihan-Duval et al., 2018; Papkou et al., 2019).

599 It is worthwhile to note that, unlike earlier studies, where the ancient samples were grouped  
600 into 6 sampling time points (*e.g.*, Ludwig et al. (2009)) or 9 sampling time points (*e.g.*, Wutke  
601 et al. (2016)), our analysis is conducted on the raw aDNA data, *i.e.*, 201 ancient horse samples  
602 from 62 sampling time points. To investigate the effect of grouping samples on the estimates of

603 the selection coefficient and the allele age, we perform an empirical study by random grouping  
604 the 62 sampling time points into 9 time points like Wutke et al. (2016) and then apply our  
605 method on 1000 randomly grouped samples. As illustrated in Figure 12, the resulting estimates  
606 show some variability around the estimates obtained from the raw samples with 62 sampling  
607 time points. The relative deviations between the selection coefficient estimated from the grouped  
608 samples and the raw samples are 14.35% for *ASIP* and 28.75% for *MC1R*, respectively, and the  
609 relative deviations between the allele age estimated from the grouped samples and the raw  
610 samples are 35.45% for *ASIP* and 7.57% for *MC1R*, respectively, which implies that grouping  
611 samples can significantly alter the estimates of the selection coefficient and the allele age.

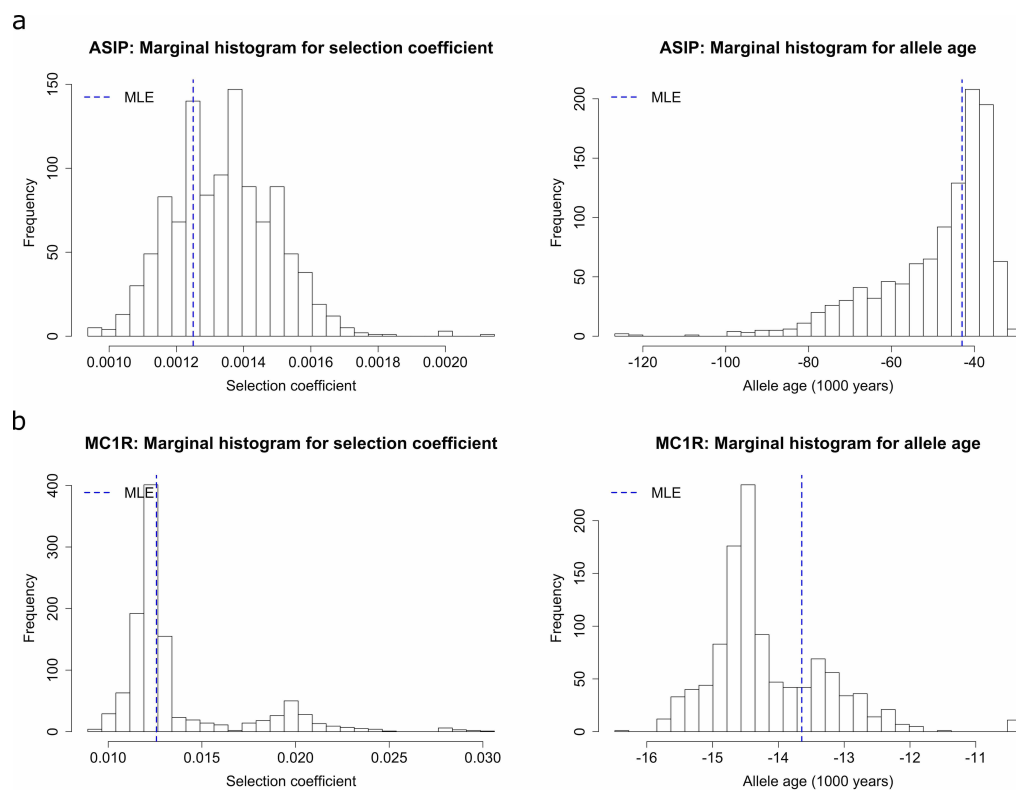

Figure 12: Effects of grouping samples on the estimates of the selection coefficient and the allele age. Marginal histograms of the estimates for 1000 randomly grouped datasets of the temporally spaced samples for (a) *ASIP* and (b) *MC1R*.

612 Recent findings of Sandoval-Castellanos et al. (2017) suggested that at the end of the Ice  
613 Age forests started to advance in Europe, and horses became increasingly dark in coat colour  
614 as they left the plains and adapted to live in forests, where dark-coloured coats would have  
615 helped them to hide. Our approach does not provide evidence of the onset of natural selection.  
616 It delivers estimates of the selection coefficient and the allele age. However, one possibility that

617 is consistent with our results is that horse base coat colour variation could be associated with  
618 their adaptation to the transition from a glacial period to an interglacial period. Polymorphisms  
619 at the *ASIP* and *MC1R* loci are associated with horse base coat colouration, creating a bay,  
620 black or chestnut coat (Rieder et al., 2001), *i.e.*, *ASIP* mutations give rise to black-coloured  
621 horses, whereas *MC1R* mutations give rise to chestnut-coloured horses. From Section 3.2, our  
622 95% confidence interval for the allele age of *ASIP* mutations include the LGM but lies mostly  
623 before the LGM. This raises the possibility that *ASIP* mutations, giving dark horses, might have  
624 been created before the LGM, whereas *MC1R* mutations, leading to paler horses, were created  
625 after the LGM. Given the findings of Finch et al. (1984) that dark-coated animals absorb heat  
626 more rapidly from solar radiation than light-coated ones, we speculate that *ASIP* mutations  
627 were favoured in horses living in cold environments during the glacial period, where dark coats  
628 would have helped them to survive, especially for the LGM. In contrast, *MC1R* mutations were  
629 favoured when the climate warmed from the late Pleistocene to the early Holocene since it  
630 might be then advantageous to be light-coated in warm environments for horses.

631 One key limitation of our method is that we infer natural selection and allele age without ac-  
632 counting for the interactions between the genes. Such interactions can be epistatic interaction,  
633 genetic linkage or others, *e.g.*, the *ASIP* and *MC1R* genes are found with epistatic interac-  
634 tions (Rieder et al., 2001), which may affect population genetic analyses. With the increasing  
635 availability of aDNA data across multiple loci, performing accurate estimation on relevant pop-  
636 ulation genetic quantities of interest while accounting for interactions among loci becomes more  
637 and more important. To extend our method to allele frequency time series data across multiple  
638 loci subject to epistatic interaction or genetic linkage, a significant challenge would be to find an  
639 alternative to calculate transition probabilities by numerically solving the KBE in our likelihood  
640 computation since it is computationally challenging and prohibitively expensive to numerically  
641 solve a high-dimensional partial differential equation.

## 642 **Acknowledgements**

643 We would like to thank the anonymous reviewers and the communicating editors for improv-  
644 ing this work with their helpful comments. This work was funded in part by the Engineering  
645 and Physical Sciences Research Council (EPSRC) Grant EP/I028498/1 to F.Y.



646 **References**

- 647 Bollback, J. P., York, T. L., & Nielsen, R. (2008). Estimation of  $2N_e s$  from temporal allele  
648 frequency data. *Genetics*, *179*, 497–502.
- 649 Burke, M. K., Liti, G., & Long, A. D. (2014). Standing genetic variation drives repeatable  
650 experimental evolution in outcrossing populations of *Saccharomyces cerevisiae*. *Molecular*  
651 *Biology and Evolution*, *31*, 3228–3239.
- 652 Clark, P. U., Dyke, A. S., Shakun, J. D., Carlson, A. E., Clark, J., Wohlfarth, B., Mitrovica,  
653 J. X., Hostetler, S. W., & McCabe, A. M. (2009). The last glacial maximum. *Science*, *325*,  
654 710–714.
- 655 Cohen, K. M., Finney, S. C., Gibbard, P. L., & Fan, J.-X. (2013). The ICS international  
656 chronostratigraphic chart. *Episodes*, *36*, 199–204.
- 657 Crank, J., & Nicolson, P. (1947). A practical method for numerical evaluation of solutions of  
658 partial differential equations of the heat-conduction type. *Mathematical Proceedings of the*  
659 *Cambridge Philosophical Society*, *43*, 50–67.
- 660 Der Sarkissian, C., Ermini, L., Schubert, M., Yang, M. A., Librado, P., Fumagalli, M., Jónsson,  
661 H., Bar-Gal, G. K., Albrechtsen, A., Vieira, F. G., Petersen, B., Ginolhac, A., Seguin-  
662 Orlando, A., Magnussen, K., Fages, A., Gamba, C., Lorente-Galdos, B., Polani, S., Steiner,  
663 C., Neuditschko, M., Jagannathan, V., Feh, C., Greenblatt, C. L., Ludwig, A., Abramson,  
664 N. I., Zimmermann, W., Schafberg, R., Tikhonov, A., Sicheritz-Ponten, T., Willerslev, E.,  
665 Marques-Bonet, T., Ryder, O. A., McCue, M., Rieder, S., Leeb, T., Slatkin, M., & Orlando,  
666 L. (2015). Evolutionary genomics and conservation of the endangered Przewalski’s horse.  
667 *Current Biology*, *25*, 2577–2583.
- 668 Durrett, R. (2008). *Probability Models for DNA Sequence Evolution*. New York: Springer-  
669 Verlag.
- 670 Efron, B., & Tibshirani, R. J. (1994). *An Introduction to the Bootstrap*. New York: CRC press.
- 671 Ferrer-Admetlla, A., Leuenberger, C., Jensen, J. D., & Wegmann, D. (2016). An approximate  
672 markov model for the Wright–Fisher diffusion and its application to time series data. *Genetics*,  
673 *203*, 831–846.

- 674 Finch, V. A., Bennett, I. L., & Holmes, C. R. (1984). Coat colour in cattle: effect on thermal  
675 balance, behaviour and growth, and relationship with coat type. *The Journal of Agricultural*  
676 *Science*, *102*, 141–147.
- 677 Fisher, R. A. (1922). On the dominance ratio. *Proceedings of the Royal Society of Edinburgh*,  
678 *42*, 321–341.
- 679 Flink, L. G., Allen, R., Barnett, R., Malmström, H., Peters, J., Eriksson, J., Andersson, L.,  
680 Dobney, K., & Larson, G. (2014). Establishing the validity of domestication genes using DNA  
681 from ancient chickens. *Proceedings of the National Academy of Sciences*, *111*, 6184–6189.
- 682 Jewett, E. M., Steinrücken, M., & Song, Y. S. (2016). The effects of population size histories  
683 on estimates of selection coefficients from time-series genetic data. *Molecular Biology and*  
684 *Evolution*, *33*, 3002–3027.
- 685 Lang, G. I., Rice, D. P., Hickman, M. J., Sodergren, E., Weinstock, G. M., Botstein, D., &  
686 Desai, M. M. (2013). Pervasive genetic hitchhiking and clonal interference in forty evolving  
687 yeast populations. *Nature*, *500*, 571–574.
- 688 Le Bihan-Duval, E., Hennequet-Antier, C., Berri, C., Beauclercq, S. A., Bourin, M. C., Boulay,  
689 M., Demeure, O., & Boitard, S. (2018). Identification of genomic regions and candidate genes  
690 for chicken meat ultimate pH by combined detection of selection signatures and QTL. *BMC*  
691 *Genomics*, *19*, 294.
- 692 Leonardi, M., Librado, P., Der Sarkissian, C., Schubert, M., Alfarhan, A. H., Alquraishi, S. A.,  
693 Al-Rasheid, K. A. S., Gamba, C., Willerslev, E., & Orlando, L. (2017). Evolutionary patterns  
694 and processes: lessons from ancient DNA. *Systematic Biology*, *66*, e1–e29.
- 695 Loog, L., Thomas, M. G., Barnett, R., Allen, R., Sykes, N., Paxinos, P. D., Lebrasseur, O.,  
696 Dobney, K., Peters, J., Manica, A., Larson, G., & Eriksson, A. (2017). Inferring allele  
697 frequency trajectories from ancient DNA indicates that selection on a chicken gene coincided  
698 with changes in medieval husbandry practices. *Molecular Biology and Evolution*, *34*, 1981–  
699 1990.
- 700 Ludwig, A., Pruvost, M., Reissmann, M., Benecke, N., Brockmann, G. A., Castañós, P., Cieslak,

- 701 M., Lippold, S., Llorente, L., Malaspinas, A.-S., Slatkin, M., & Hofreiter, M. (2009). Coat  
702 color variation at the beginning of horse domestication. *Science*, *324*, 485–485.
- 703 Malaspinas, A.-S. (2016). Methods to characterize selective sweeps using time serial samples:  
704 an ancient DNA perspective. *Molecular Ecology*, *25*, 24–41.
- 705 Malaspinas, A.-S., Malaspinas, O., Evans, S. N., & Slatkin, M. (2012). Estimating allele age  
706 and selection coefficient from time-serial data. *Genetics*, *192*, 599–607.
- 707 Mathieson, I., Lazaridis, I., Rohland, N., Mallick, S., Patterson, N., Roodenberg, S. A., Harney,  
708 E., Stewardson, K., Fernandes, D., Novak, M., Sirak, K., Gamba, C., Jones, E. R., Llamas,  
709 B., Dryomov, S., Pickrell, J., Arsuaga, J. L., de Castro, J. B., Carbonell, E., Gerritsen, F.,  
710 Khokhlov, A., Kuznetsov, P., Lozano, M., Meller, H., Mochalov, O., Moiseyev, V., Guerra,  
711 M. A. R., Roodenberg, J., Vergés, J. M., Krause, J., Cooper, A., Alt, K. W., Brown, D.,  
712 Anthony, D., Lalueza-Fox, C., Haak, W., Pinhasi, R., & Reich, D. (2015). Genome-wide  
713 patterns of selection in 230 ancient Eurasians. *Nature*, *528*, 499–503.
- 714 Papkou, A., Guzella, T., Yang, W., Koepper, S., Pees, B., Schalkowski, R., Barg, M.-C., Rosen-  
715 stiel, P. C., Teotónio, H., & Schulenburg, H. (2019). The genomic basis of Red Queen dynamics  
716 during rapid reciprocal host–pathogen coevolution. *Proceedings of the National Academy of*  
717 *Sciences*, *116*, 923–928.
- 718 Pruvost, M., Bellone, R., Benecke, N., Sandoval-Castellanos, E., Cieslak, M., Kuznetsova, T.,  
719 Morales-Muñiz, A., O’Connor, T., Reissmann, M., Hofreiter, M., & Ludwig, A. (2011). Geno-  
720 types of predomestic horses match phenotypes painted in Paleolithic works of cave art. *Pro-*  
721 *ceedings of the National Academy of Sciences*, *108*, 18626–18630.
- 722 Rieder, S., Taourit, S., Mariat, D., Langlois, B., & Guérin, G. (2001). Mutations in the agouti  
723 (ASIP), the extension (MC1R), and the brown (TYRP1) loci and their association to coat  
724 color phenotypes in horses (*Equus caballus*). *Mammalian Genome*, *12*, 450–455.
- 725 Sandoval-Castellanos, E., Wutke, S., Gonzalez-Salazar, C., & Ludwig, A. (2017). Coat colour  
726 adaptation of post-glacial horses to increasing forest vegetation. *Nature Ecology & Evolution*,  
727 *1*, 1816.

- 728 Schraiber, J. G., Evans, S. N., & Slatkin, M. (2016). Bayesian inference of natural selection  
729 from allele frequency time series. *Genetics*, *203*, 493–511.
- 730 Slatkin, M., & Rannala, B. (2000). Estimating allele age. *Annual Review of Genomics and*  
731 *Human Genetics*, *1*, 225–249.
- 732 Song, Y. S., & Steinrücken, M. (2012). A simple method for finding explicit analytic transition  
733 densities of diffusion processes with general diploid selection. *Genetics*, *190*, 1117–1129.
- 734 Steinrücken, M., Bhaskar, A., & Song, Y. S. (2014). A novel spectral method for inferring  
735 general diploid selection from time series genetic data. *The Annals of Applied Statistics*, *8*,  
736 2203–2222.
- 737 Sverrisdóttir, O. O., Timpson, A., Toombs, J., Lecoeur, C., Froguel, P., Carretero, J. M.,  
738 Arsuaga Ferreras, J. L., Götherström, A., & Thomas, M. G. (2014). Direct estimates of  
739 natural selection in Iberia indicate calcium absorption was not the only driver of lactase  
740 persistence in Europe. *Molecular Biology and Evolution*, *31*, 975–983.
- 741 Valleriani, A. (2016). A conditional likelihood is required to estimate the selection coefficient  
742 in ancient DNA. *Scientific Reports*, *6*, 31561.
- 743 Wisner, M. J., Ribeck, N., & Lenski, R. E. (2013). Long-term dynamics of adaptation in asexual  
744 populations. *Science*, *342*, 1364–1367.
- 745 Wright, S. (1931). Evolution in Mendelian populations. *Genetics*, *16*, 97–159.
- 746 Wutke, S., Benecke, N., Sandoval-Castellanos, E., Döhle, H.-J., Friederich, S., Gonzalez, J.,  
747 Hallsson, J. H., Hofreiter, M., Lõugas, L., Magnell, O., Morales-Muniz, A., Orlando, L.,  
748 Pálsdóttir, A. H., Reissmann, M., Ruttikay, M., Trinks, A., & Ludwig, A. (2016). Spotted  
749 phenotypes in horses lost attractiveness in the Middle Ages. *Scientific Reports*, *6*, 38548.
